# Supplementary material
Source: Royal Society of Chemistry journal article supplement (doi:10.1039/d6md00088f)
Supplement: d6md00088f1.pdf [file d6md00088f1.pdf]

## Supporting Information

### **Beyond Acrylamide: A Structure-Guided Investigation of Covalent Warheads in the Development of CDK7 Inhibitors**

Yu Cao<sup>1,2,#</sup>, Yiqing Huang<sup>3,7#</sup>, Yunlong Pan<sup>1,#</sup>, Jialuo Mao<sup>4,#</sup>, Lixin Gao<sup>5</sup>, Jiankang Zhang<sup>1</sup>, Huajian Zhu<sup>1</sup>, Shourong Liu<sup>2</sup>, Rangxiao Zhuang<sup>2</sup>, Yang Liu<sup>6,\*</sup>, Yubo Zhou<sup>3,4,5,7,\*</sup>, Jiaan Shao<sup>1,\*</sup>

<sup>1</sup>*School of Medicine, Hangzhou City University, Hangzhou, 310015, China*

<sup>2</sup>*Department of Pharmaceutical Preparation, Hangzhou Xixi Hospital, Hangzhou, 310023, China*

<sup>3</sup>*School of Pharmaceutical Sciences, Southern Medical University, Guangzhou, 510515, China*

<sup>4</sup>*School of Chinese Materia Medica, Nanjing University of Chinese Medicine, Nanjing 210023, P. R. China*

<sup>5</sup>*The National Center for Drug Screening, Shanghai Institute of Materia Medica, Chinese Academy of Sciences, Shanghai 201203, China*

<sup>6</sup>*Chengda Pharmaceutical Co., LTD. Jiaxing, Zhejiang, 314100, China*

<sup>7</sup>*Zhongshan Institute for Drug Discovery, Shanghai Institute of Materia Medica, Chinese Academy of Sciences, Zhongshan 528400, China.*

# Contributed equally

\* Corresponding author

E-mail addresses: liuyang@chengdapharm.com (Y. Liu); ybzhou@simm.ac.cn (Y. Zhou); shaoja@zucc.edu.cn (J. Shao).

*Table of contents*

|                                                     |           |
|-----------------------------------------------------|-----------|
| <b>Title page</b>                                   | <b>S1</b> |
| <b>Table of contents</b>                            | <b>S2</b> |
| <b>Copies of NMR spectra of target compounds</b>    | <b>S3</b> |
| <b>LC-MS of B15 and Cysteine conjugate (M1-M3).</b> | <b>S4</b> |

# $^1\text{H}$ NMR and $^{13}\text{C}$ NMR spectra

$^1\text{H}$  NMR and  $^{13}\text{C}$  NMR spectra of **A01** in  $\text{DMSO-}d_6$

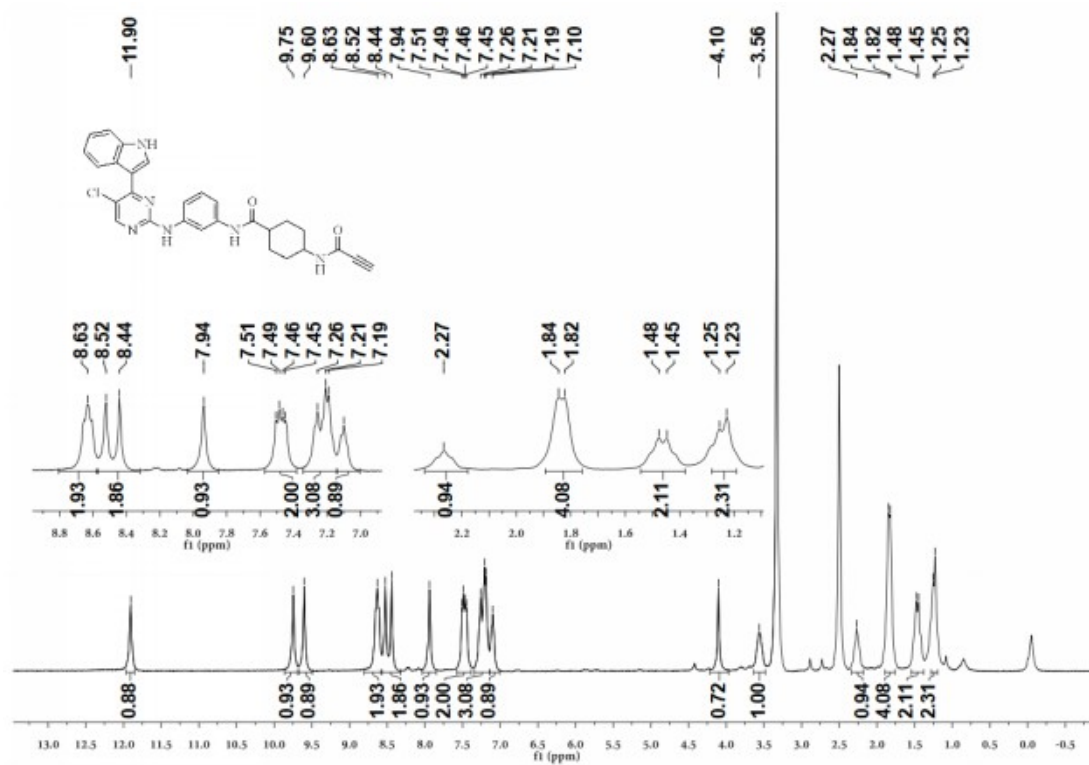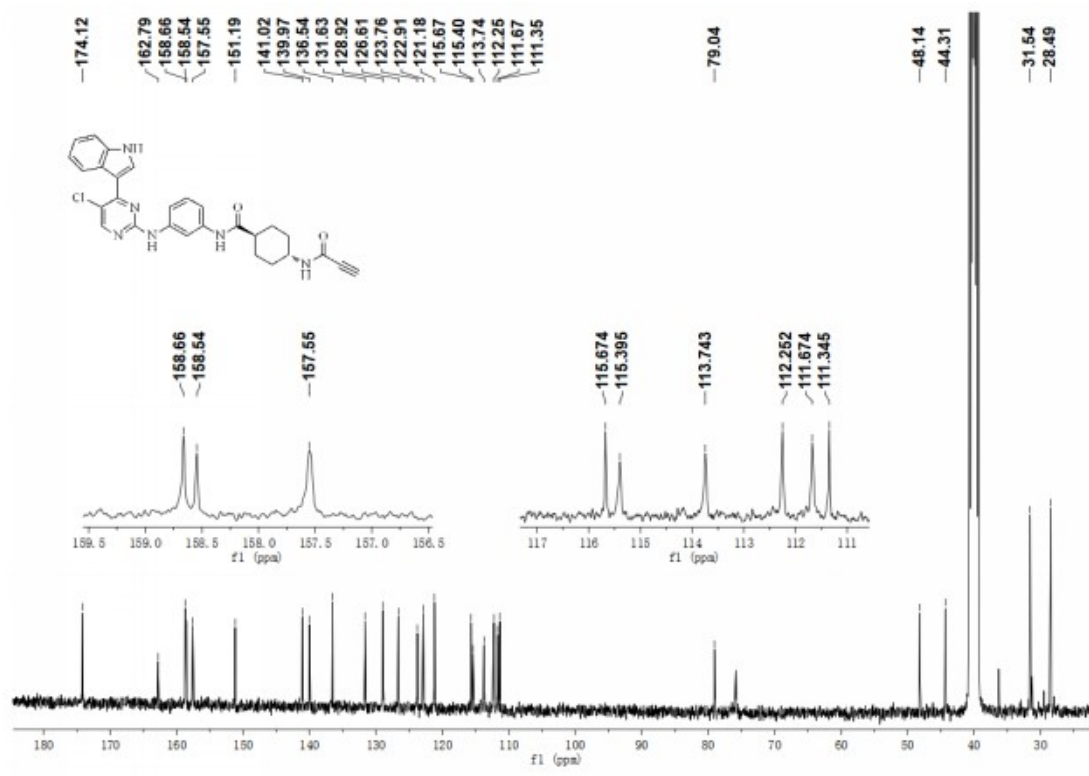

$^1\text{H}$  NMR and  $^{13}\text{C}$  NMR spectra of **A02** in  $\text{DMSO-}d_6$

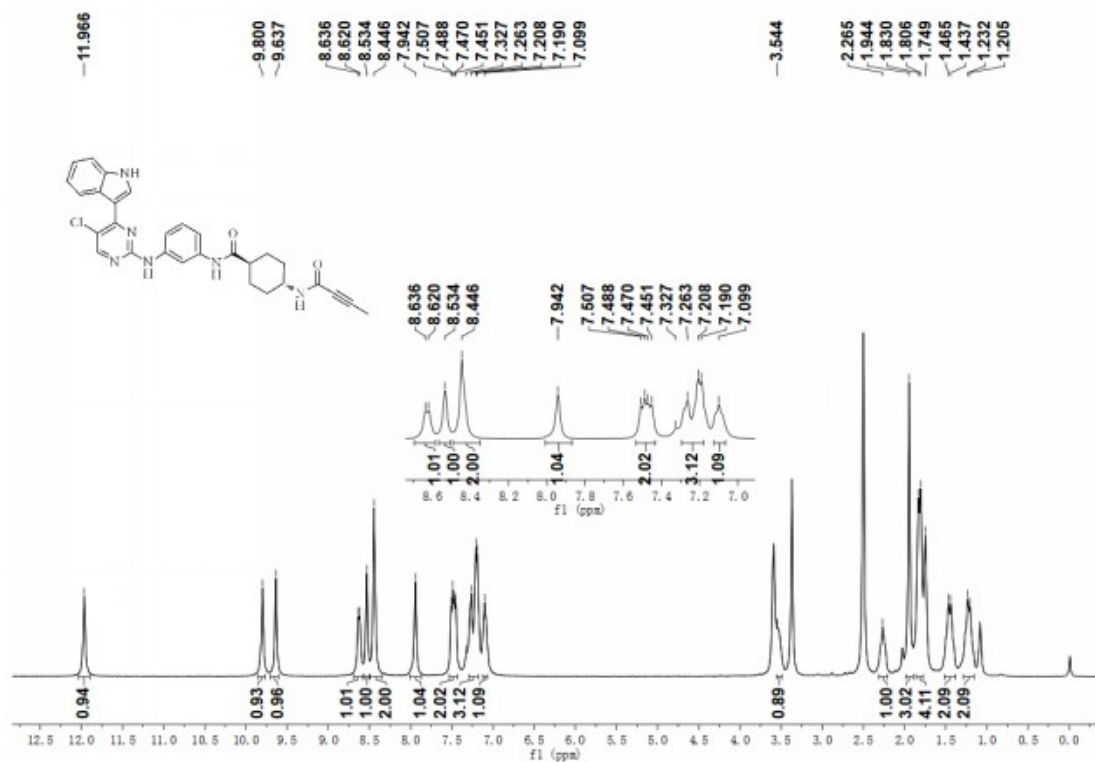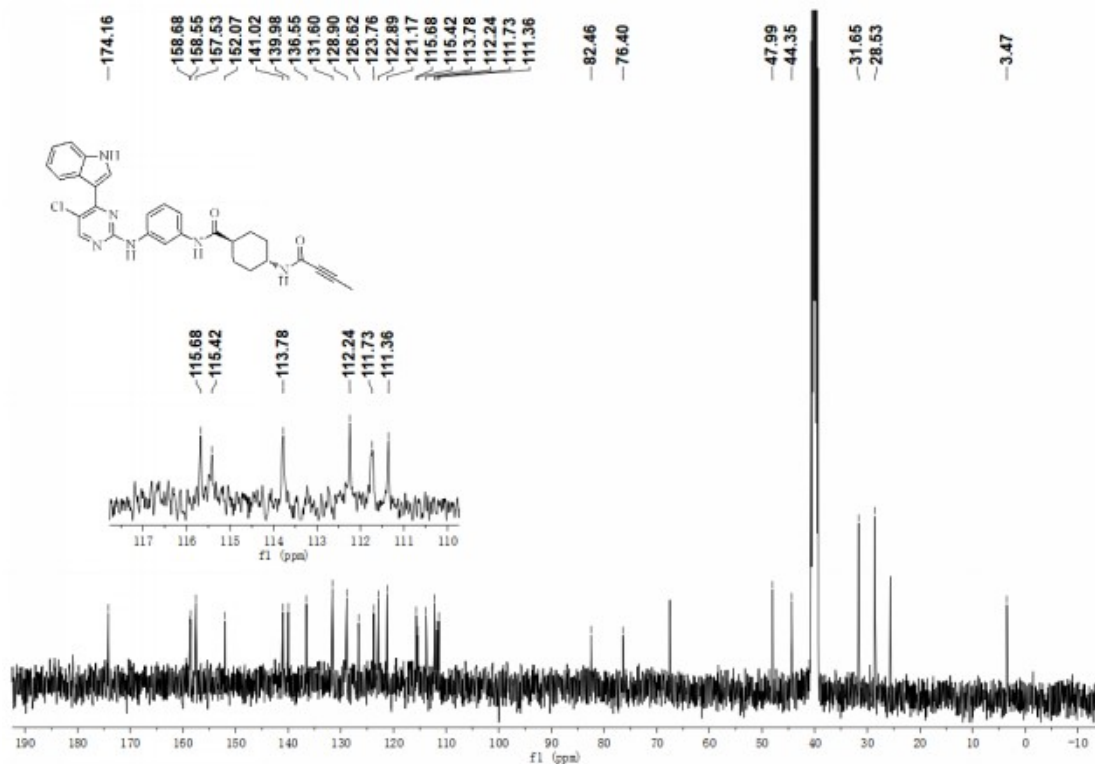

$^1\text{H}$  NMR and  $^{13}\text{C}$  NMR spectra of A03 in  $\text{DMSO-}d_6$

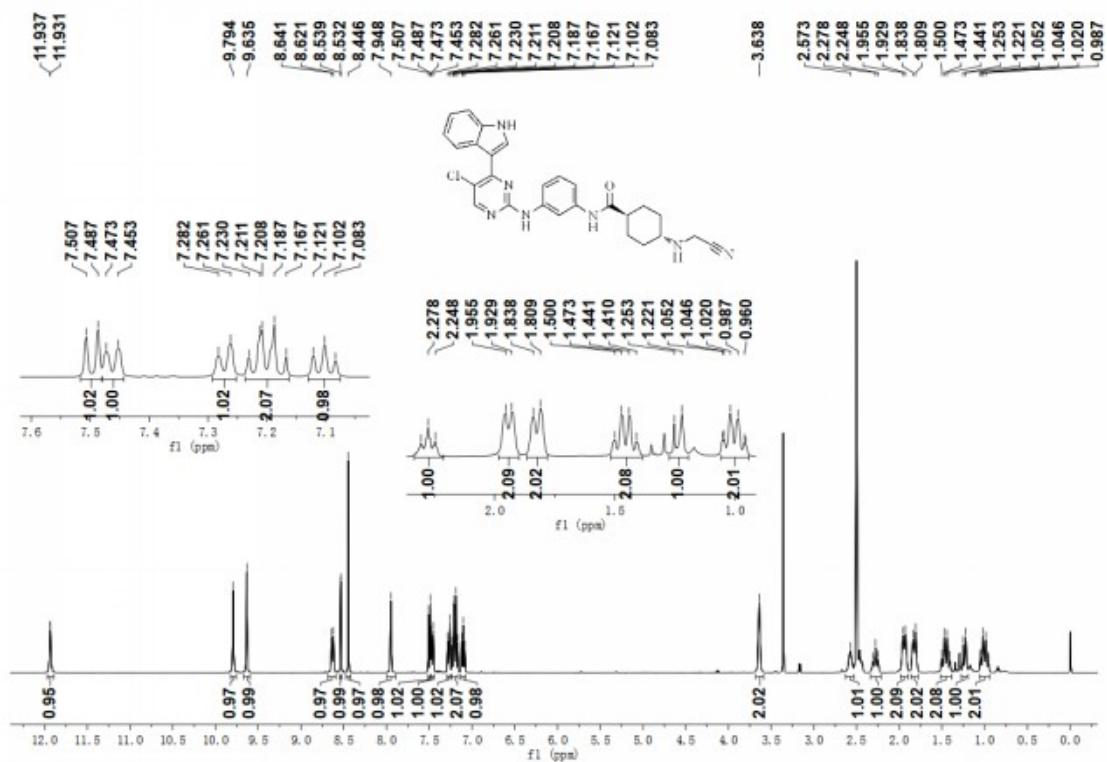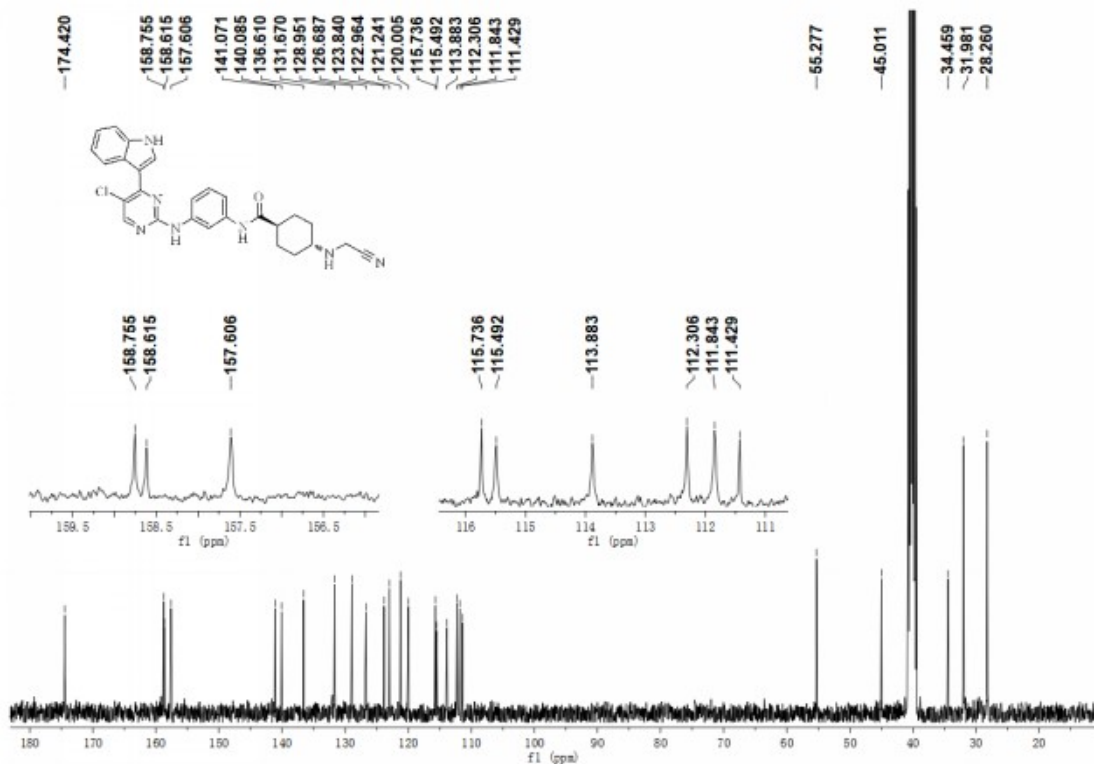

$^1\text{H}$  NMR and  $^{13}\text{C}$  NMR spectra of A04 in DMSO- $d_6$

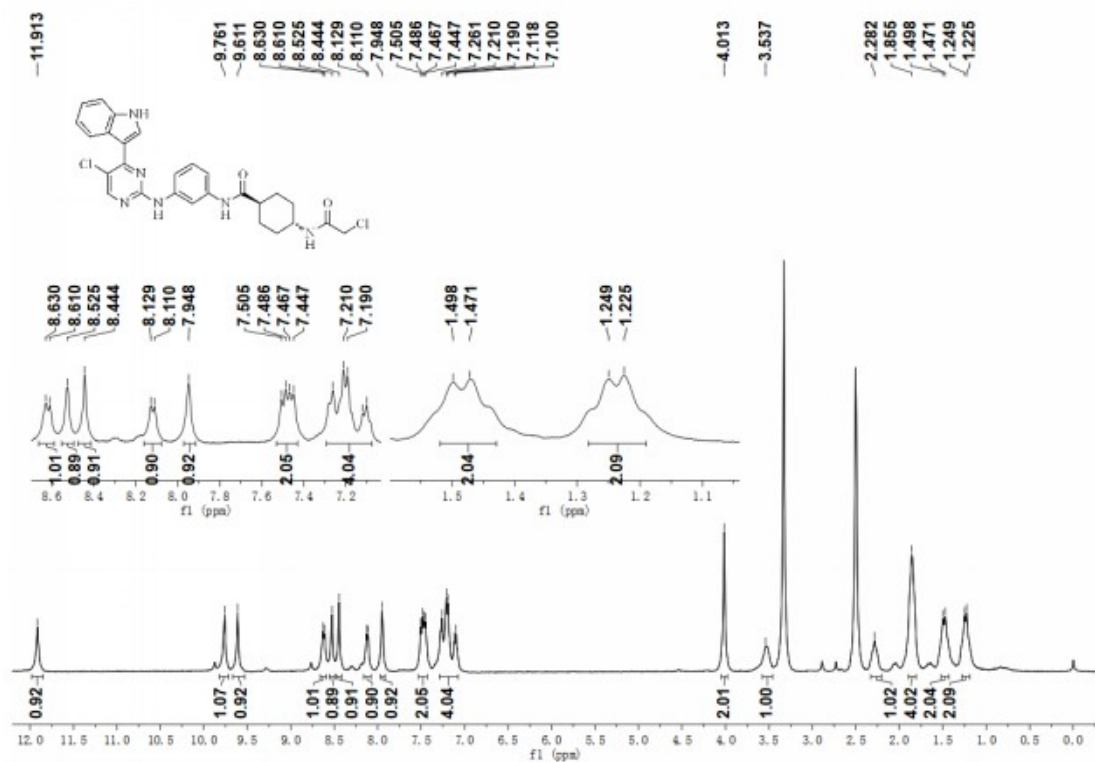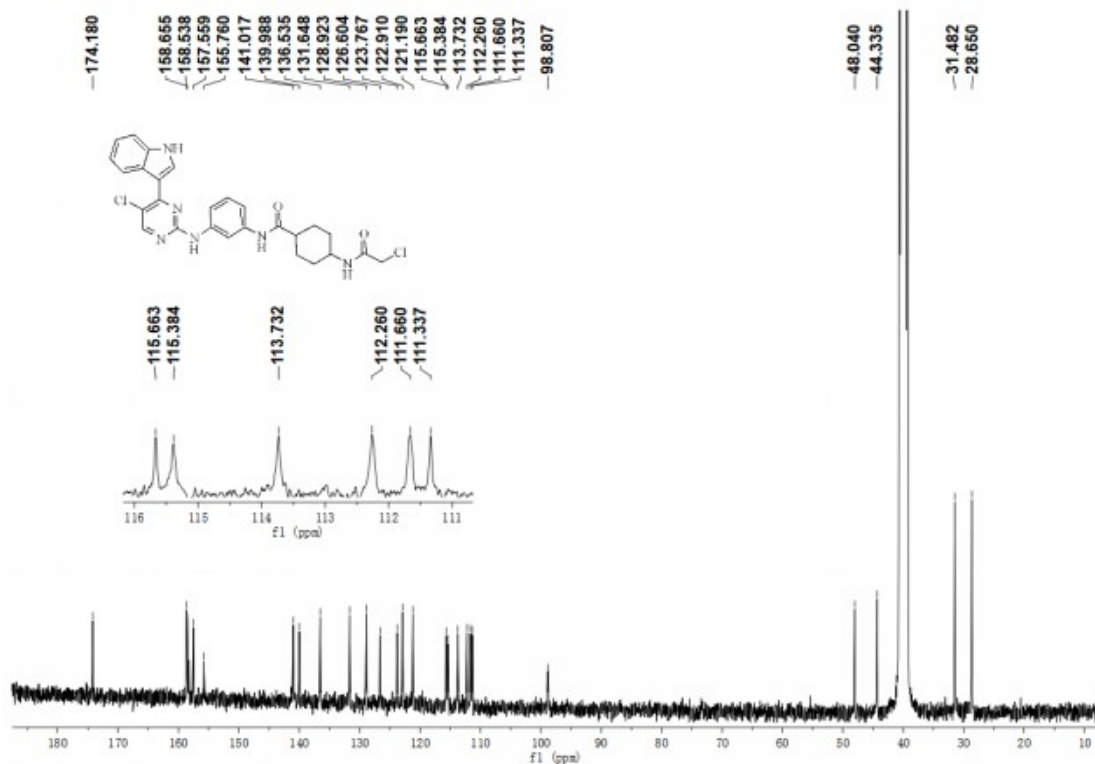

$^1\text{H}$  NMR and  $^{13}\text{C}$  NMR spectra of **A05** in  $\text{DMSO-}d_6$

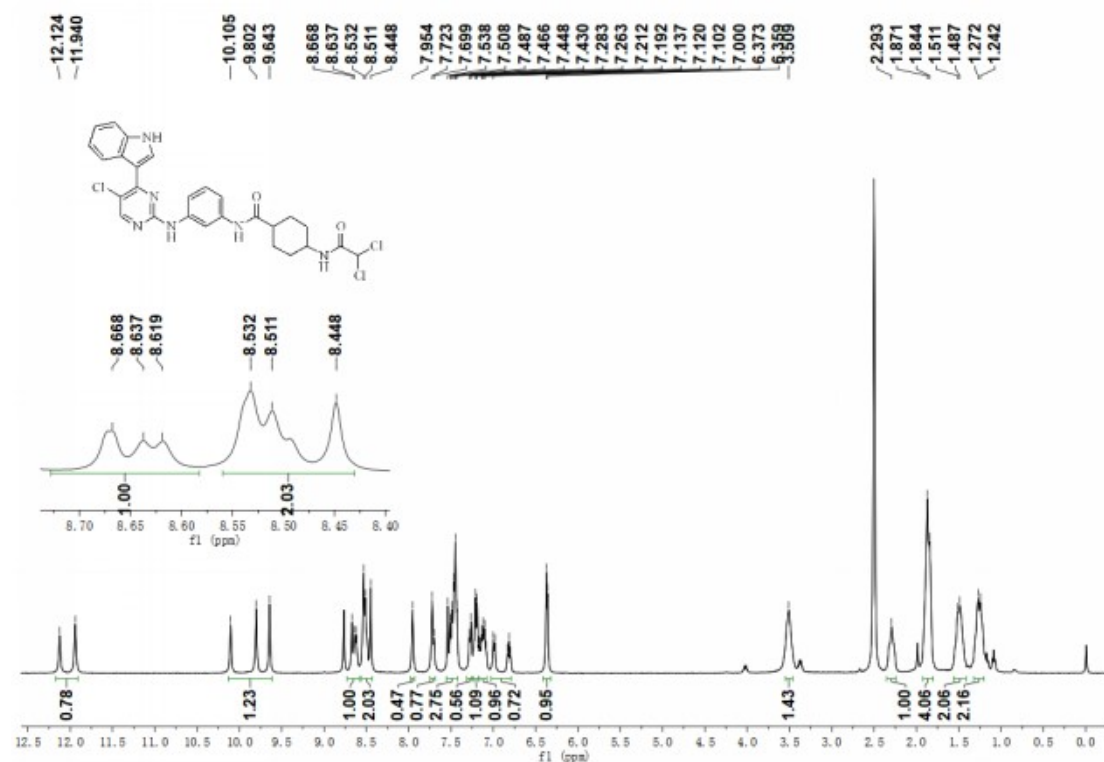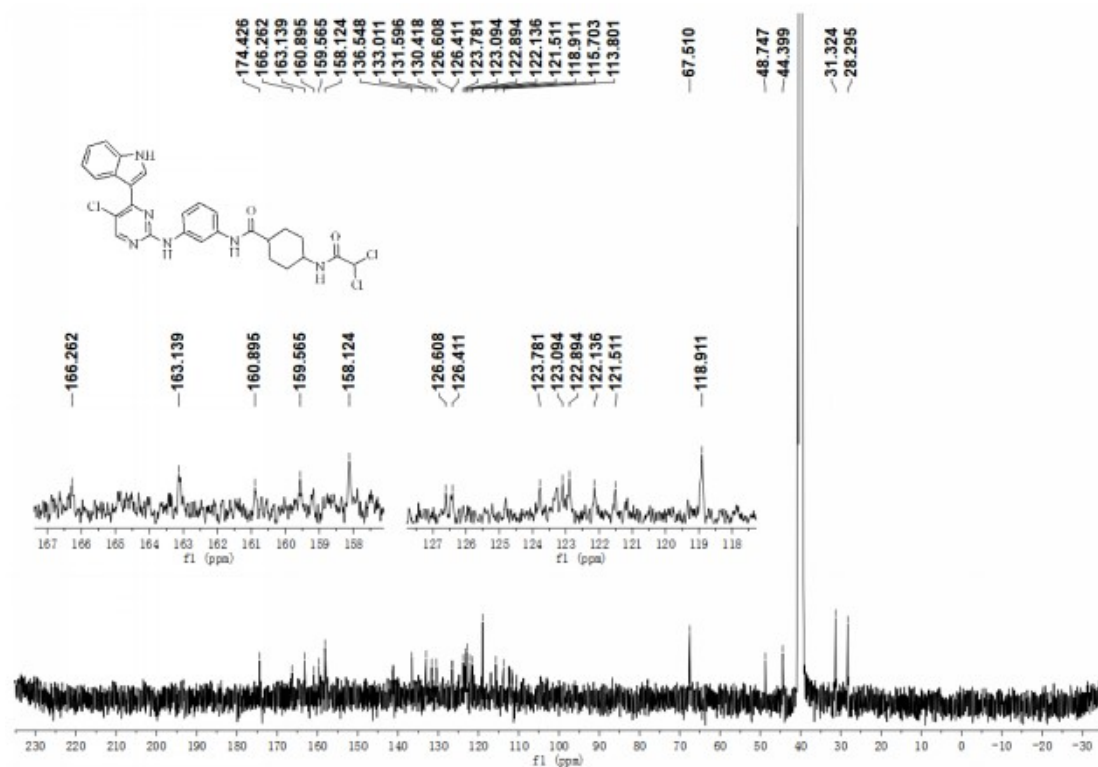

$^1\text{H}$  NMR and  $^{13}\text{C}$  NMR spectra of A06 in  $\text{DMSO-}d_6$

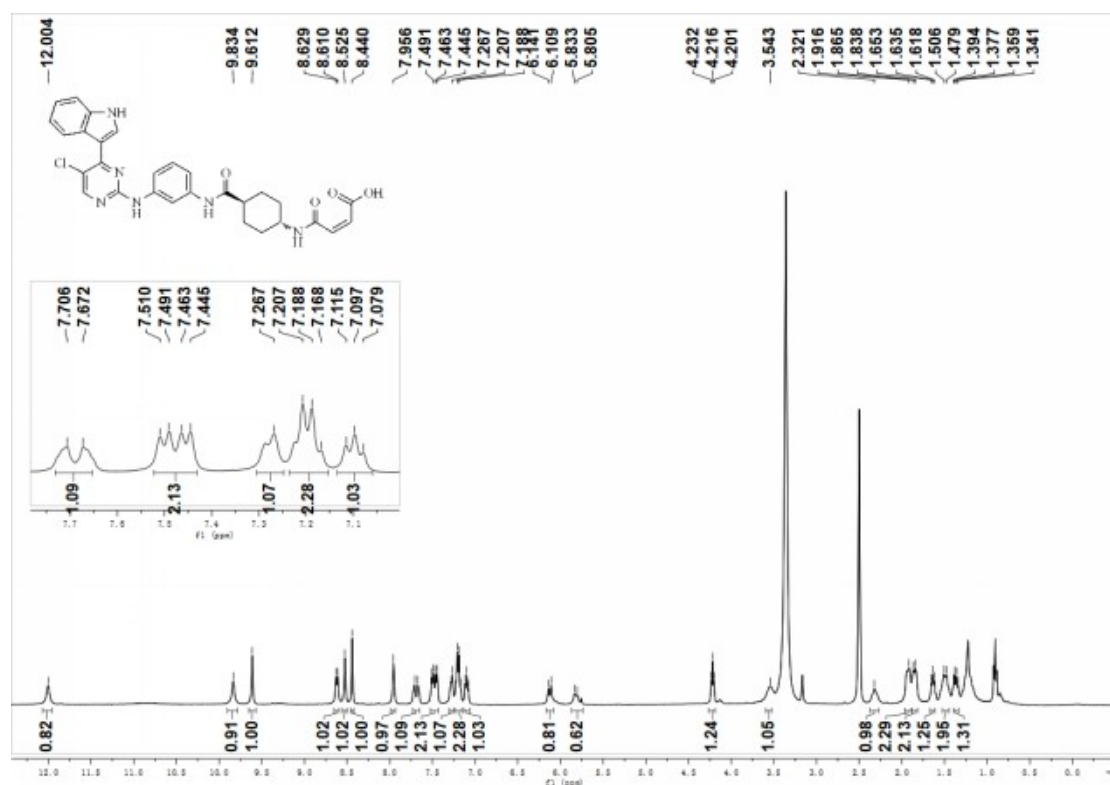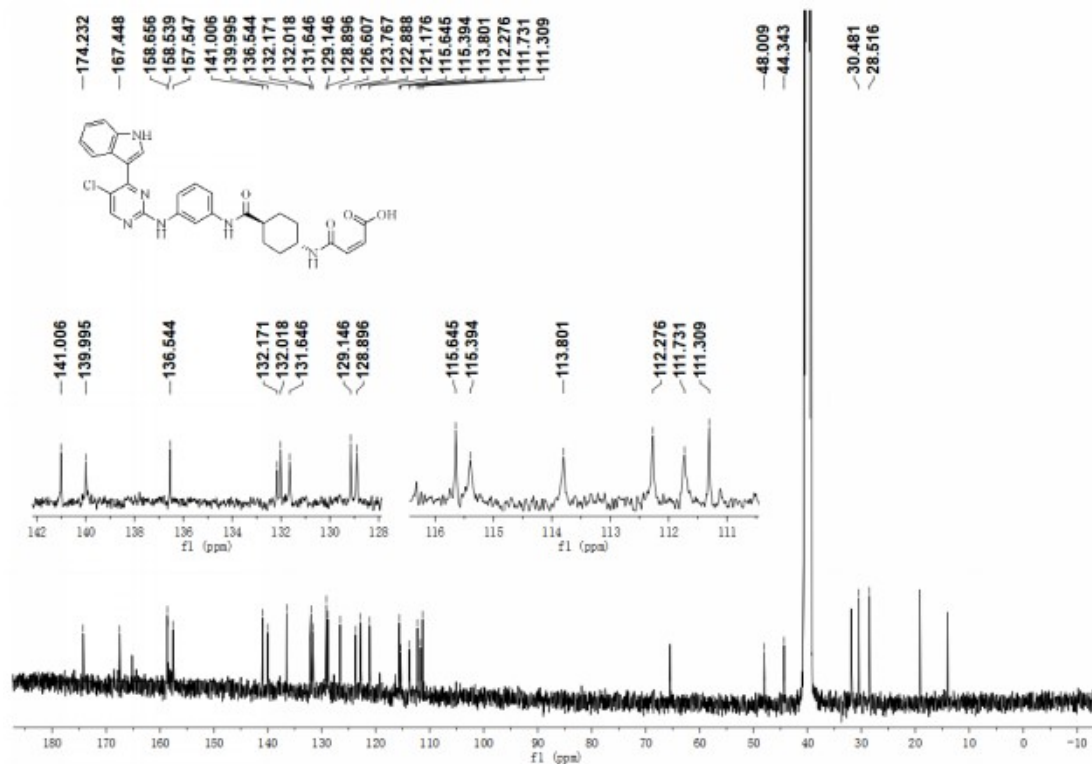

$^1\text{H}$  NMR and  $^{13}\text{C}$  NMR spectra of A07 in  $\text{DMSO-}d_6$

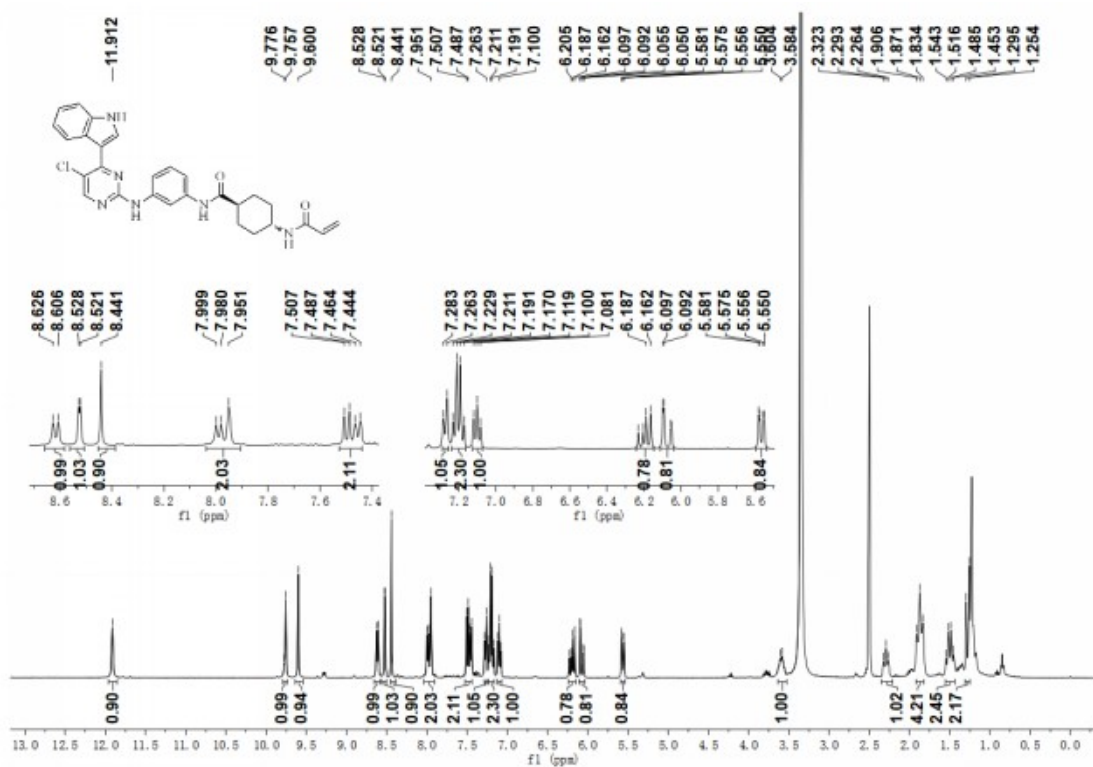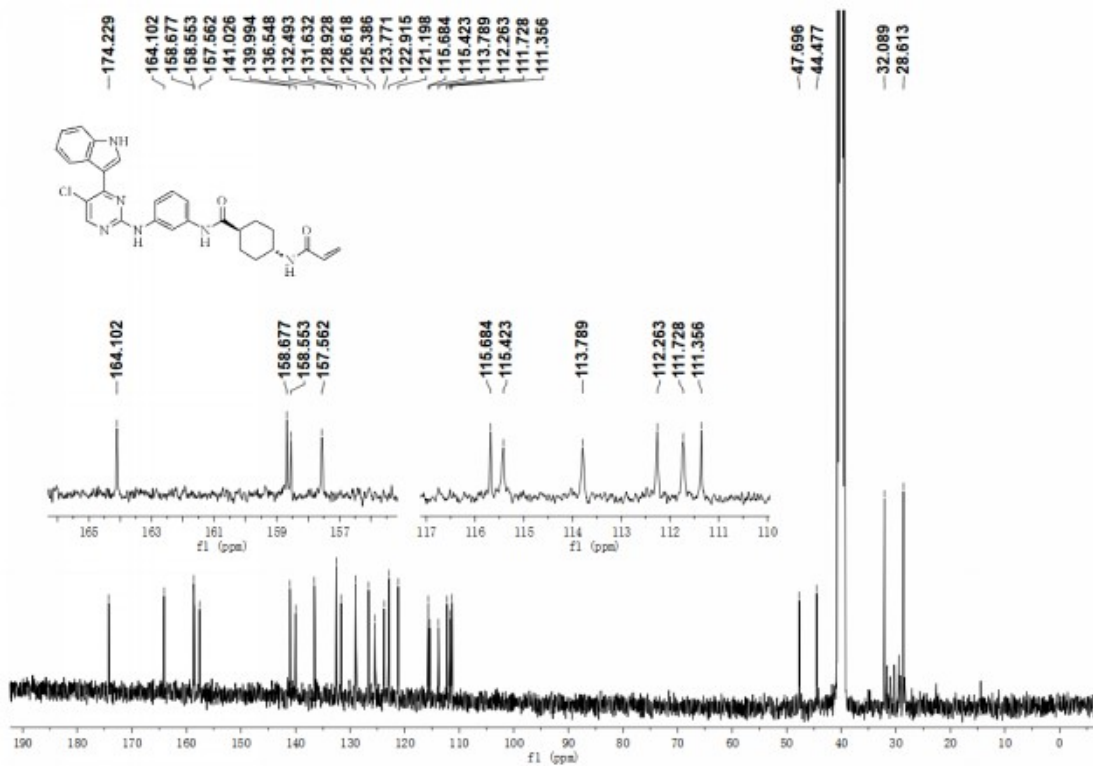

$^1\text{H}$  NMR and  $^{13}\text{C}$  NMR spectra of A08 in  $\text{DMSO-}d_6$

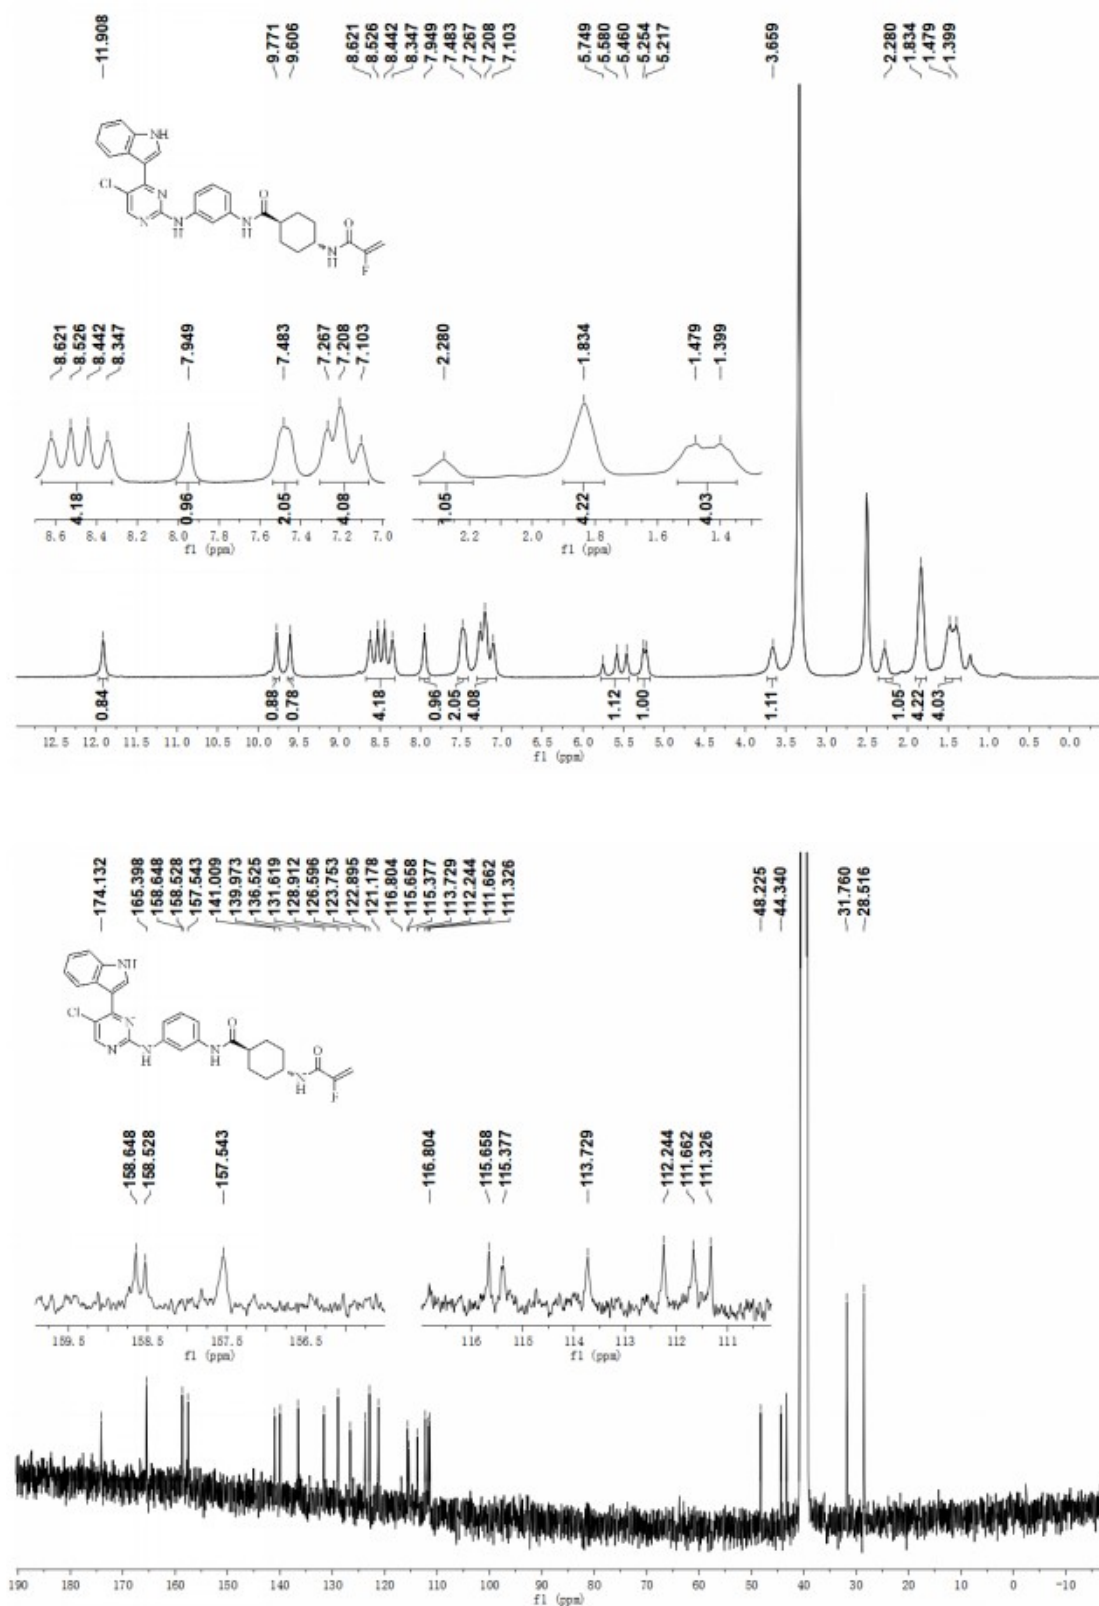

$^1\text{H}$  NMR and  $^{13}\text{C}$  NMR spectra of A09 in  $\text{DMSO-}d_6$

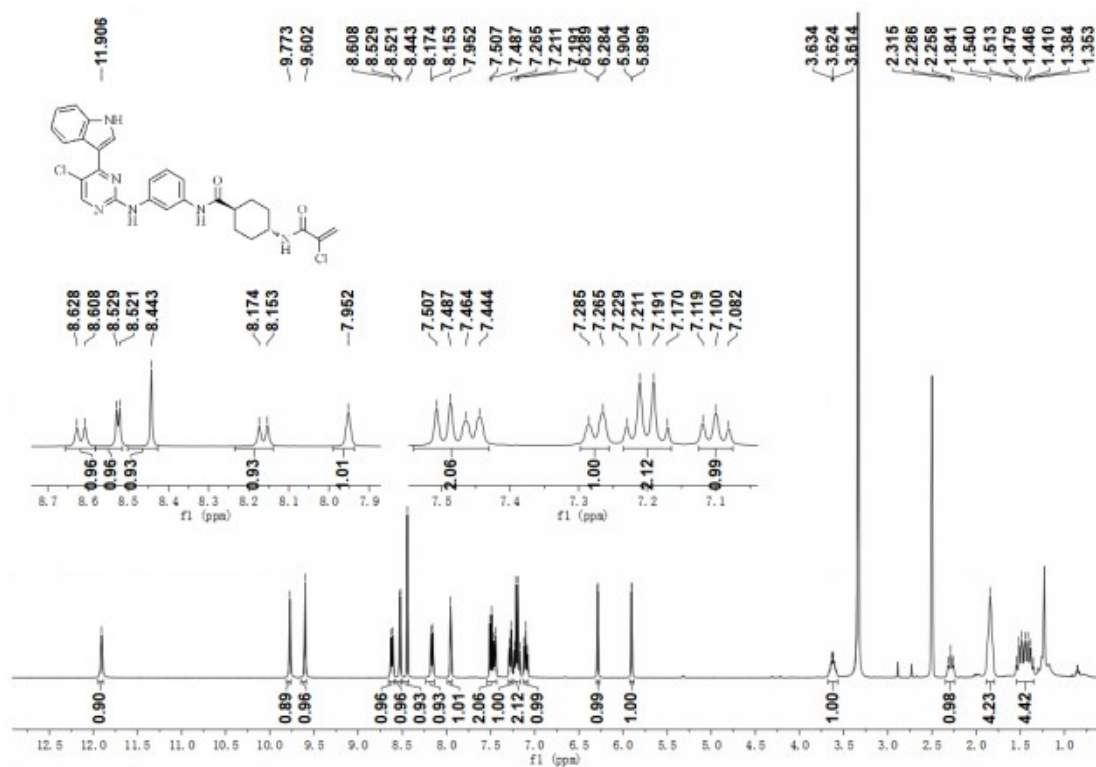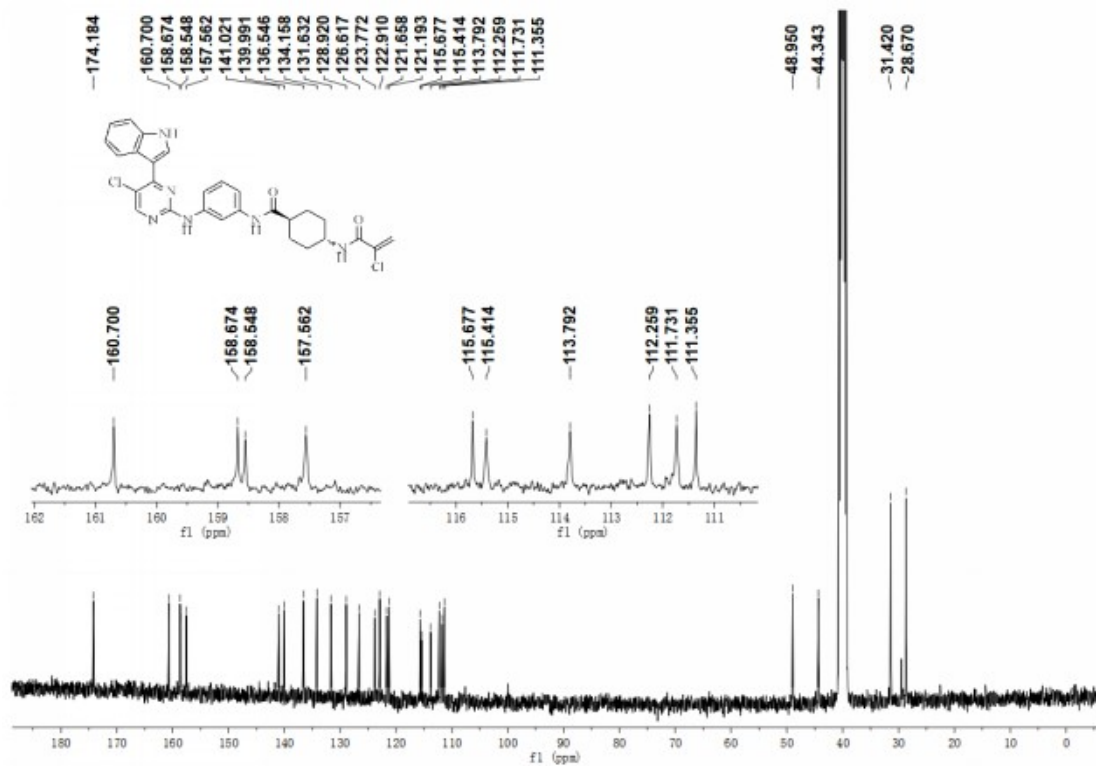

$^1\text{H}$  NMR and  $^{13}\text{C}$  NMR spectra of A10 in  $\text{DMSO-}d_6$

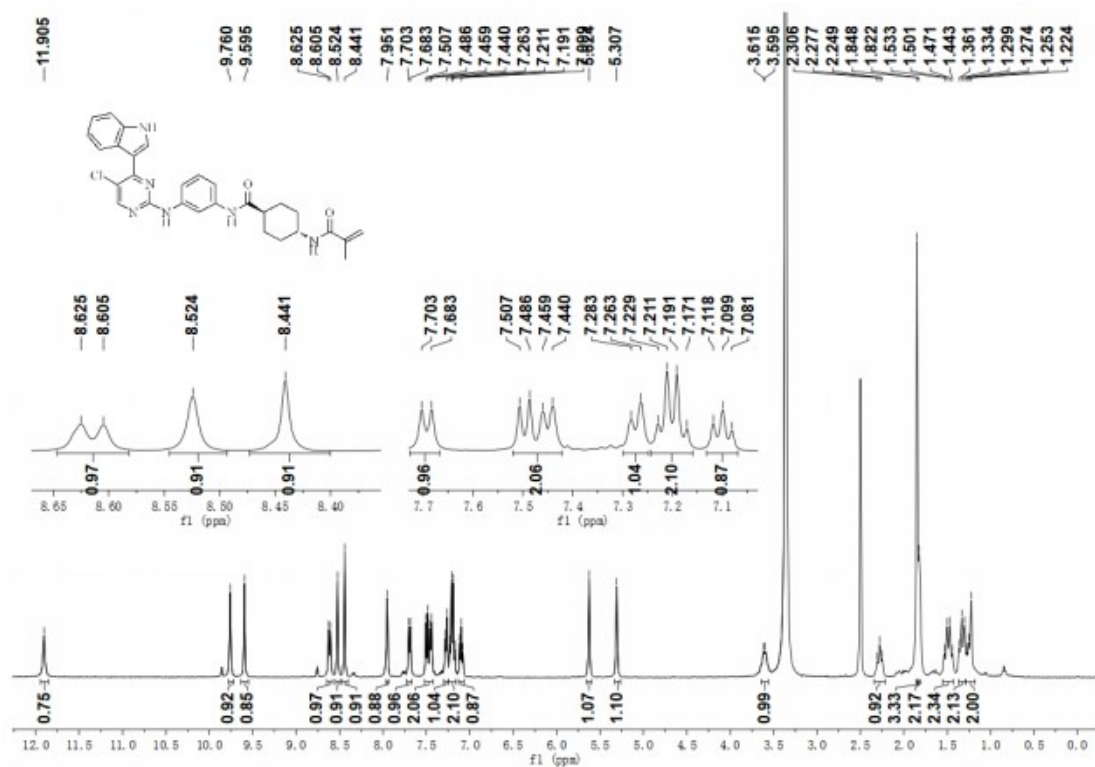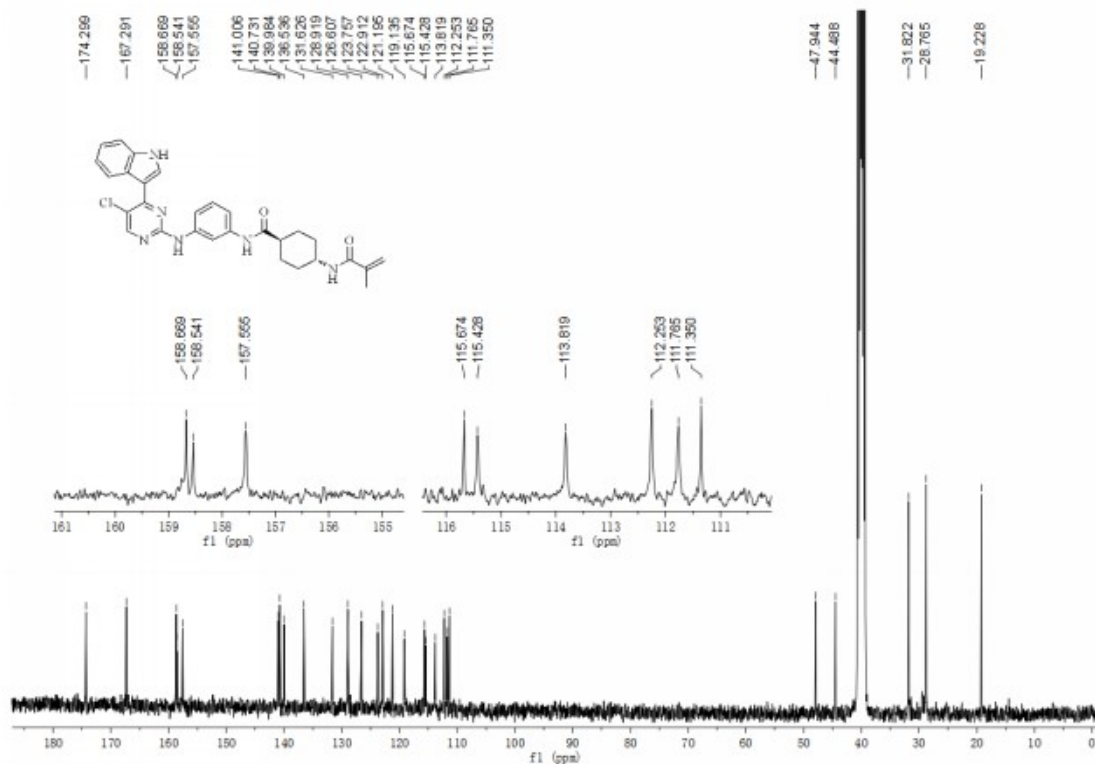

$^1\text{H}$  NMR and  $^{13}\text{C}$  NMR spectra of **A11** in  $\text{DMSO-}d_6$

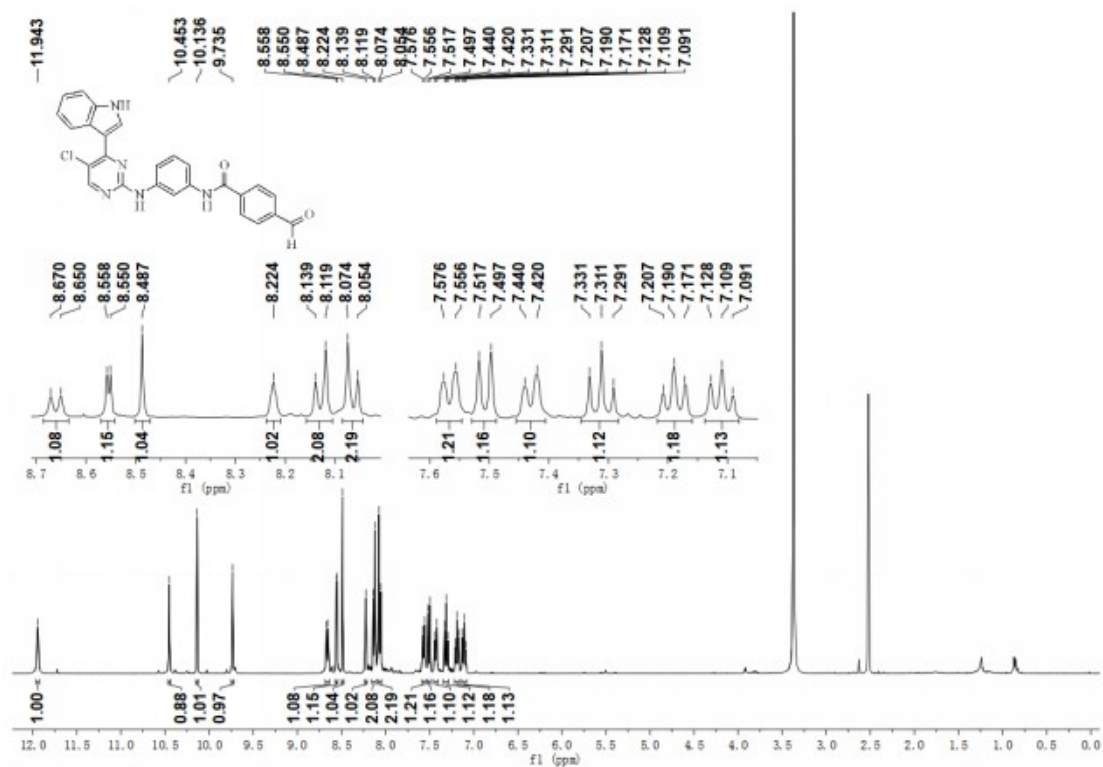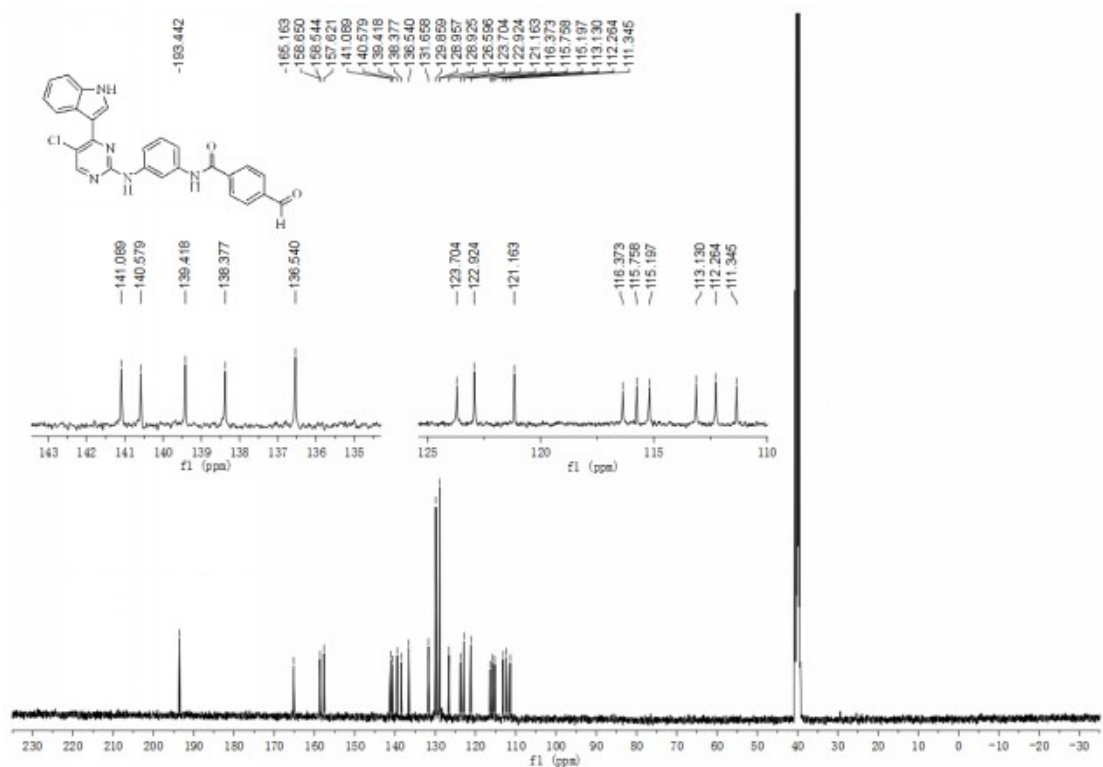

$^1\text{H}$  NMR and  $^{13}\text{C}$  NMR spectra of **A12** in  $\text{DMSO-}d_6$

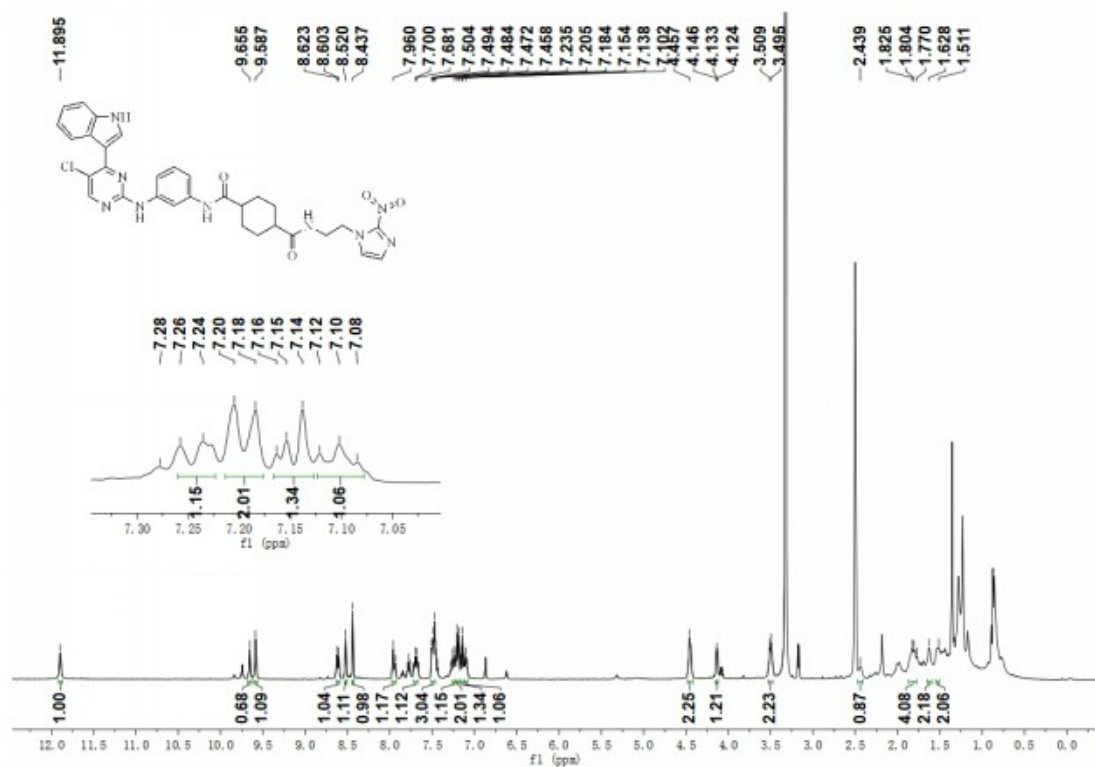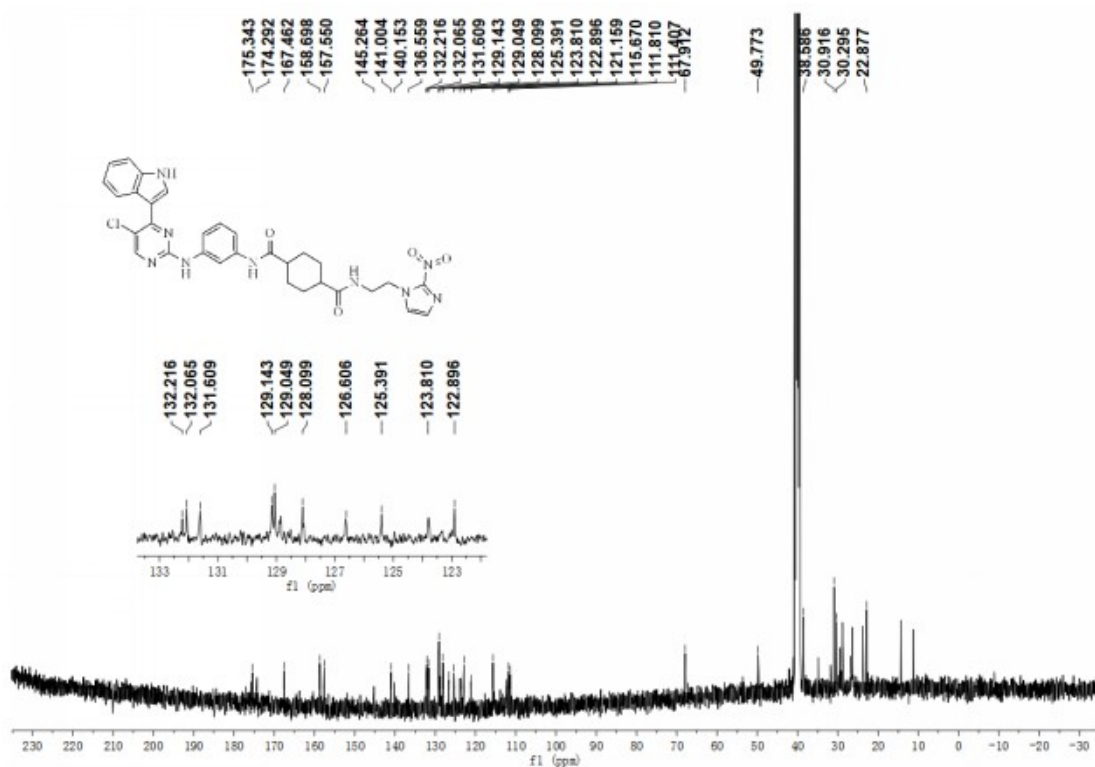

$^1\text{H}$  NMR and  $^{13}\text{C}$  NMR spectra of **B01** in  $\text{DMSO-}d_6$

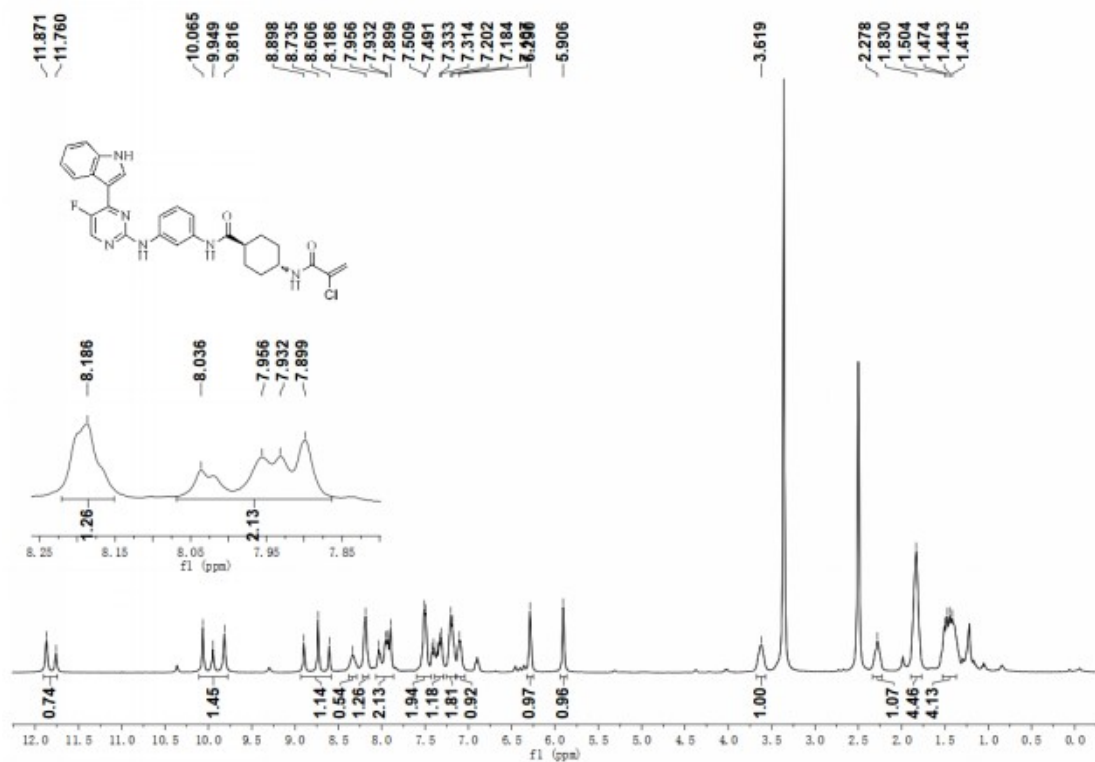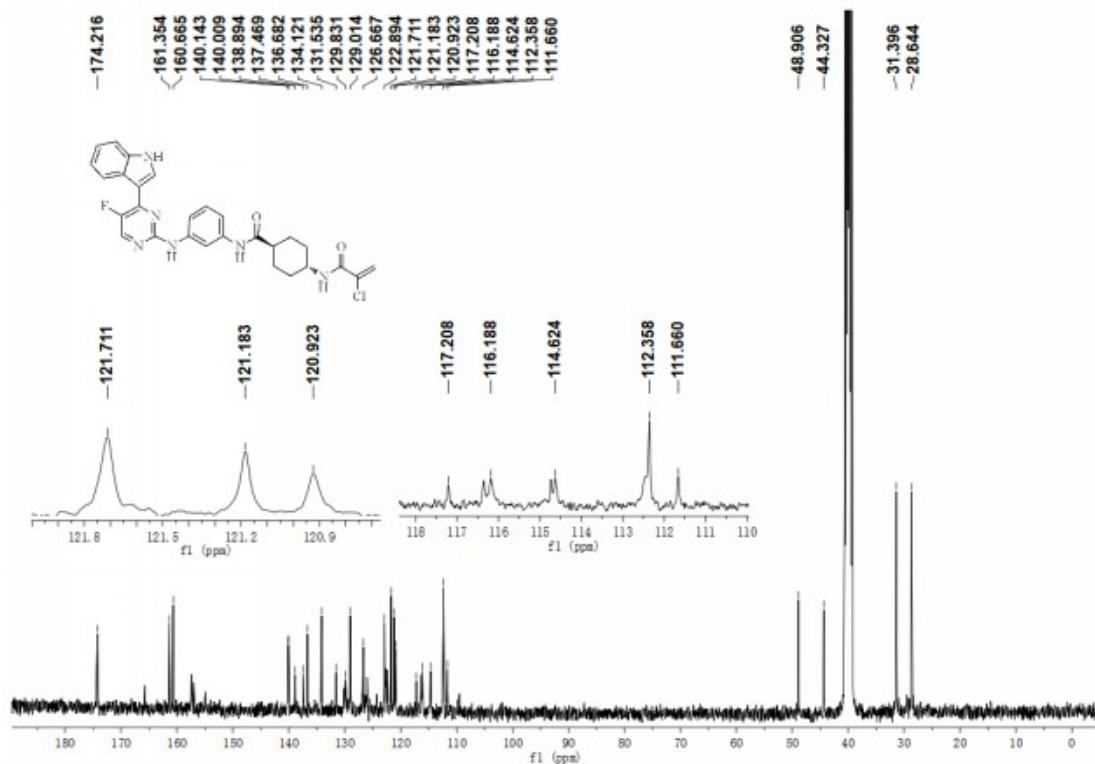

$^1\text{H}$  NMR and  $^{13}\text{C}$  NMR spectra of **B02** in  $\text{DMSO-}d_6$

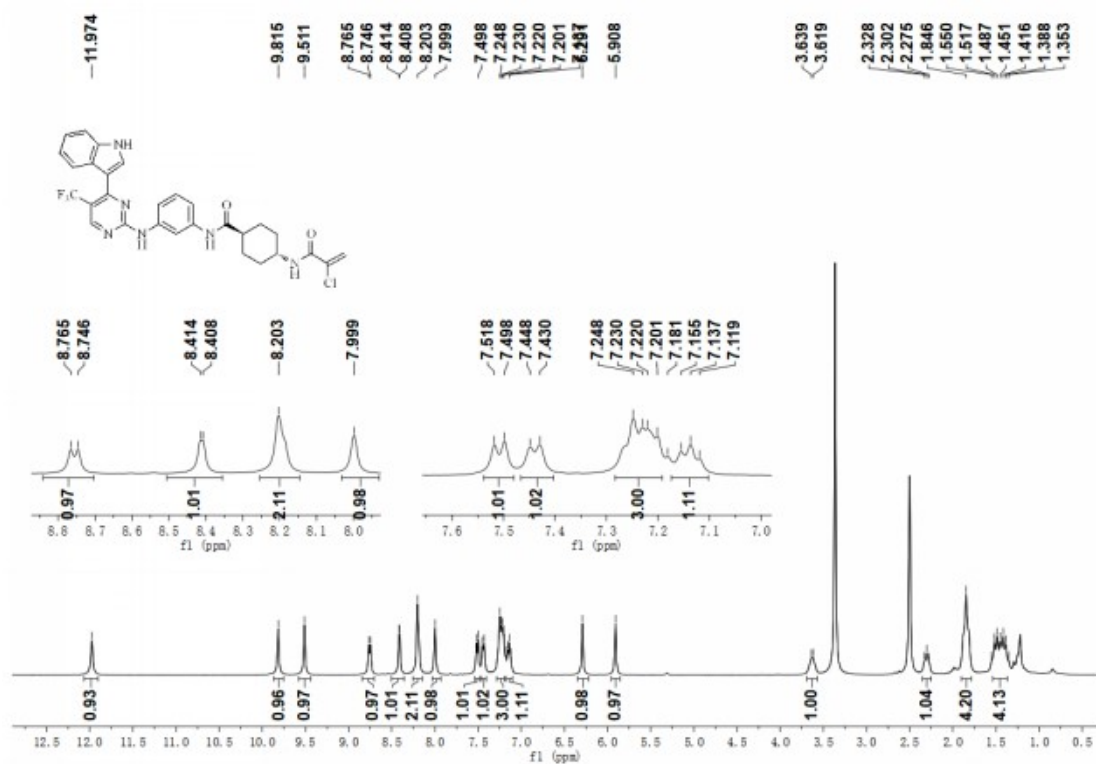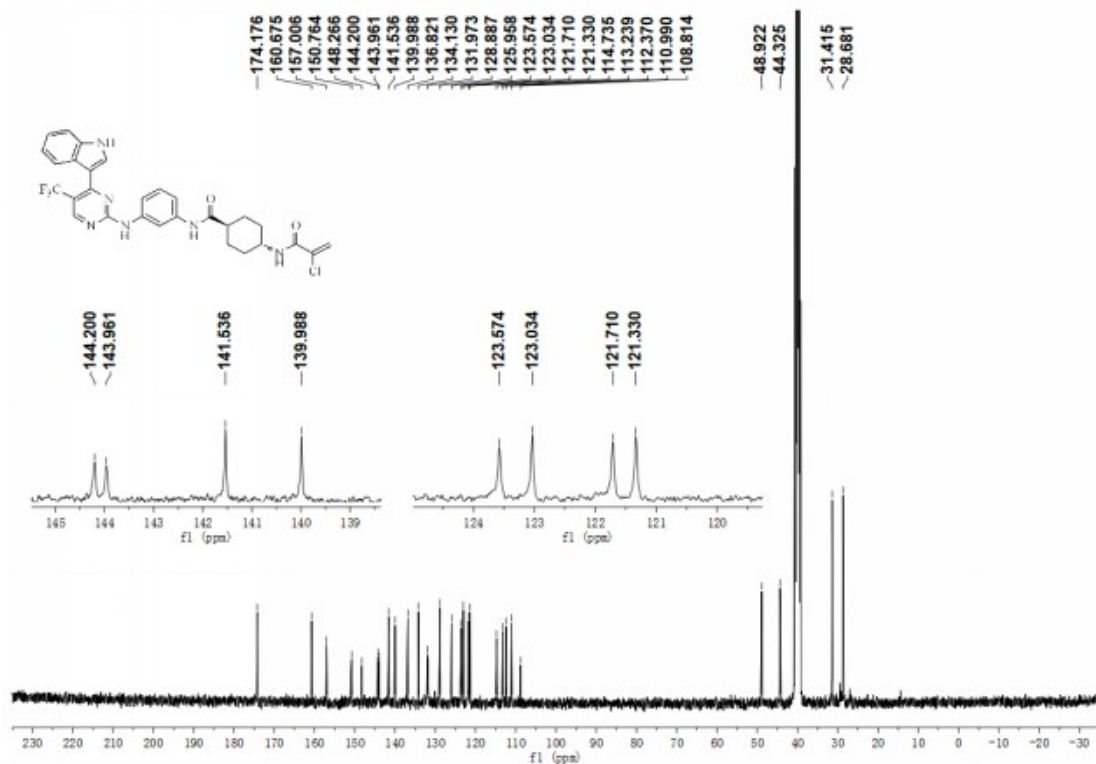

$^1\text{H}$  NMR and  $^{13}\text{C}$  NMR spectra of **B03** in  $\text{DMSO-}d_6$

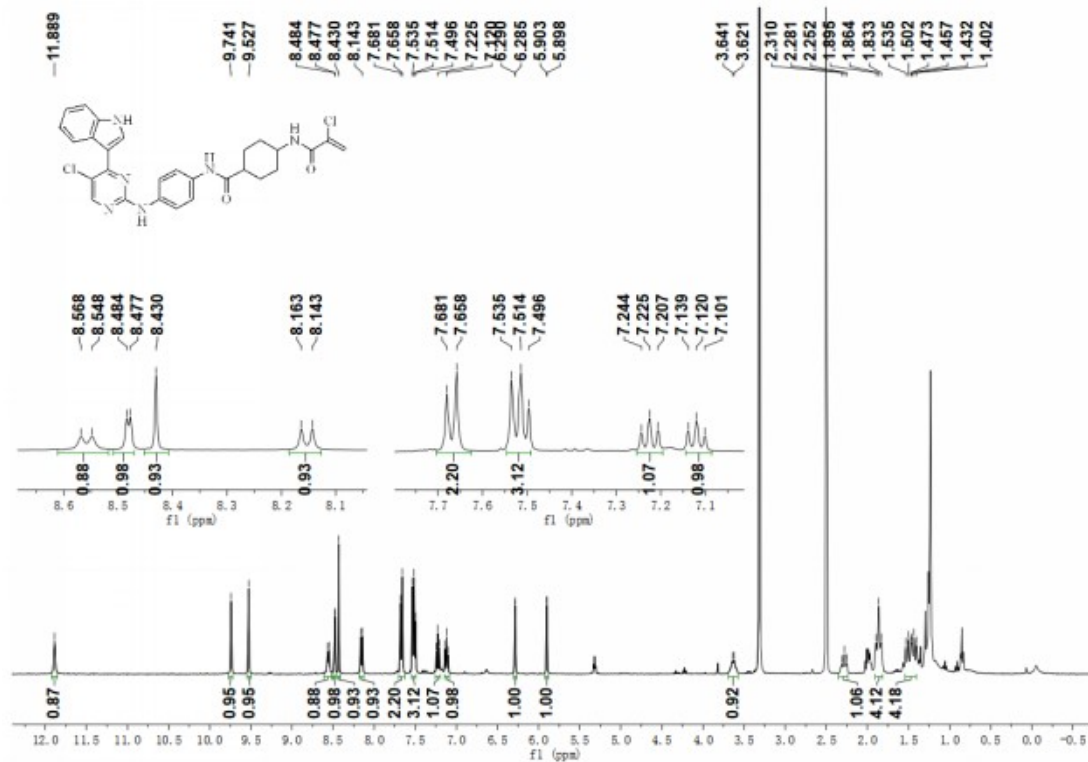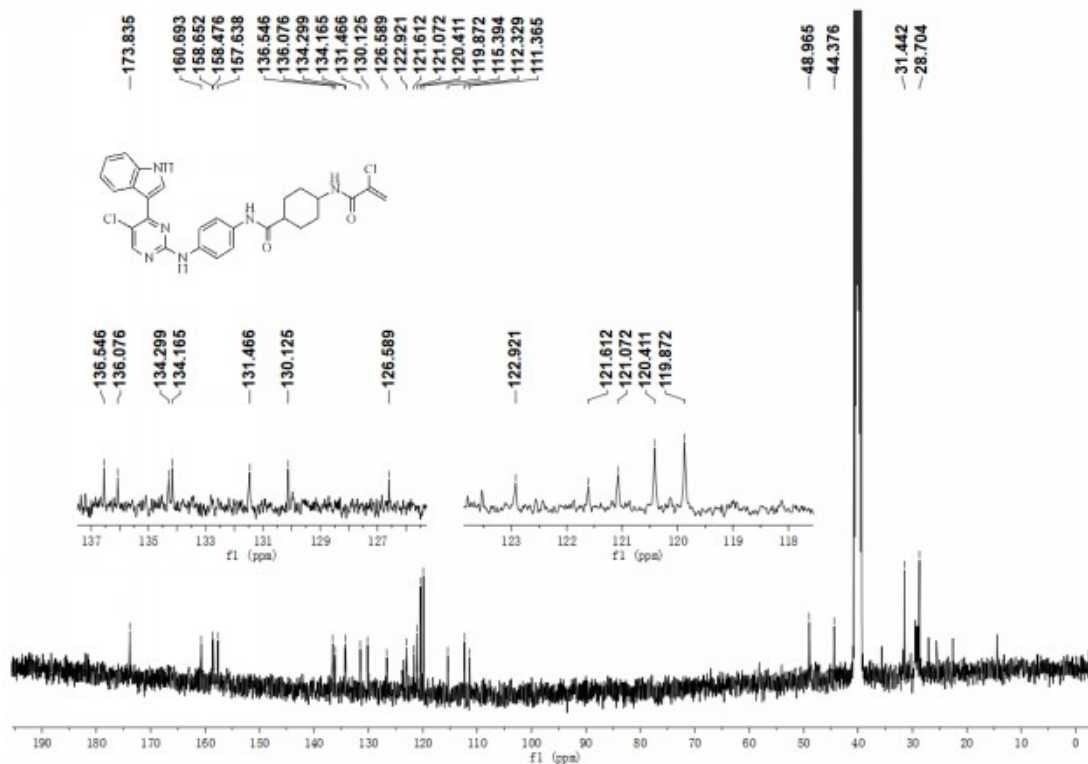

$^1\text{H}$  NMR and  $^{13}\text{C}$  NMR spectra of **B04** in  $\text{DMSO-}d_6$

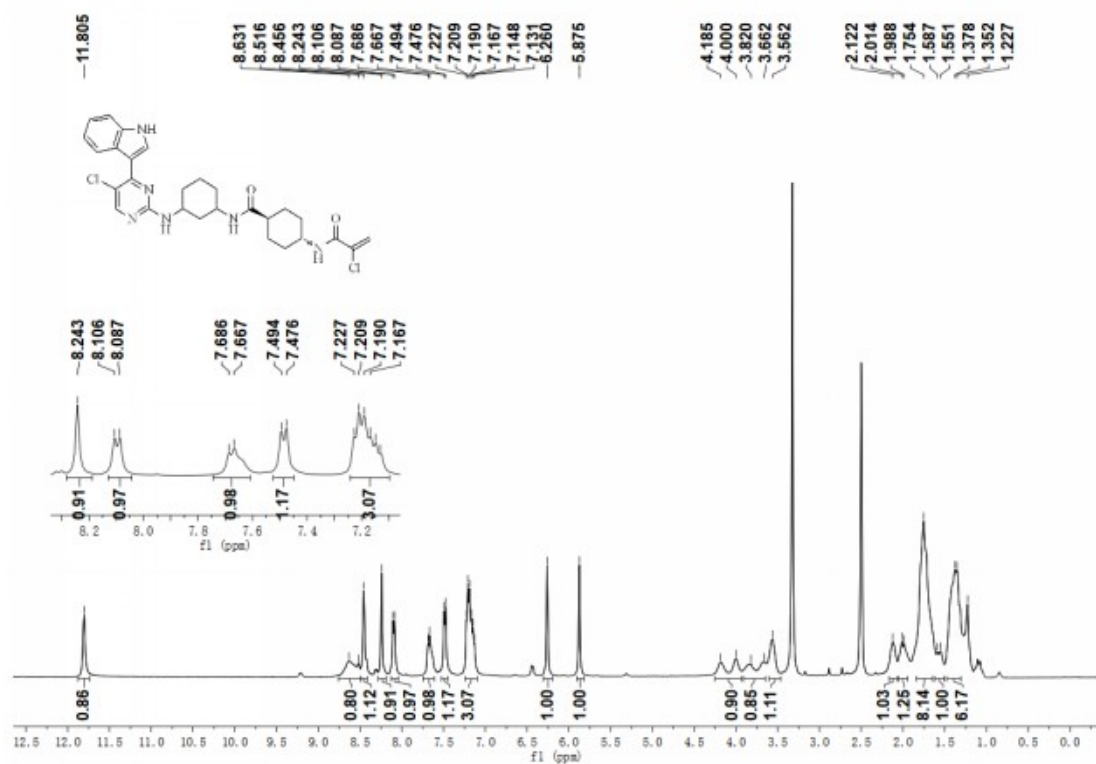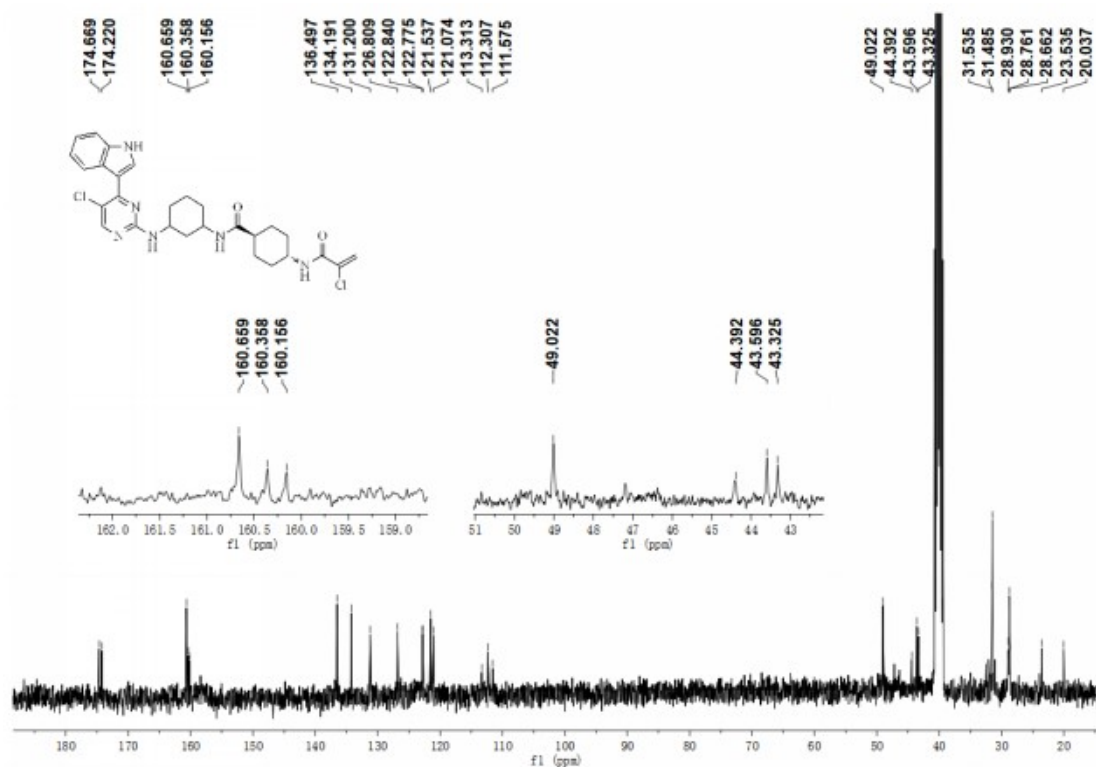

$^1\text{H}$  NMR and  $^{13}\text{C}$  NMR spectra of **B05** in  $\text{DMSO-}d_6$

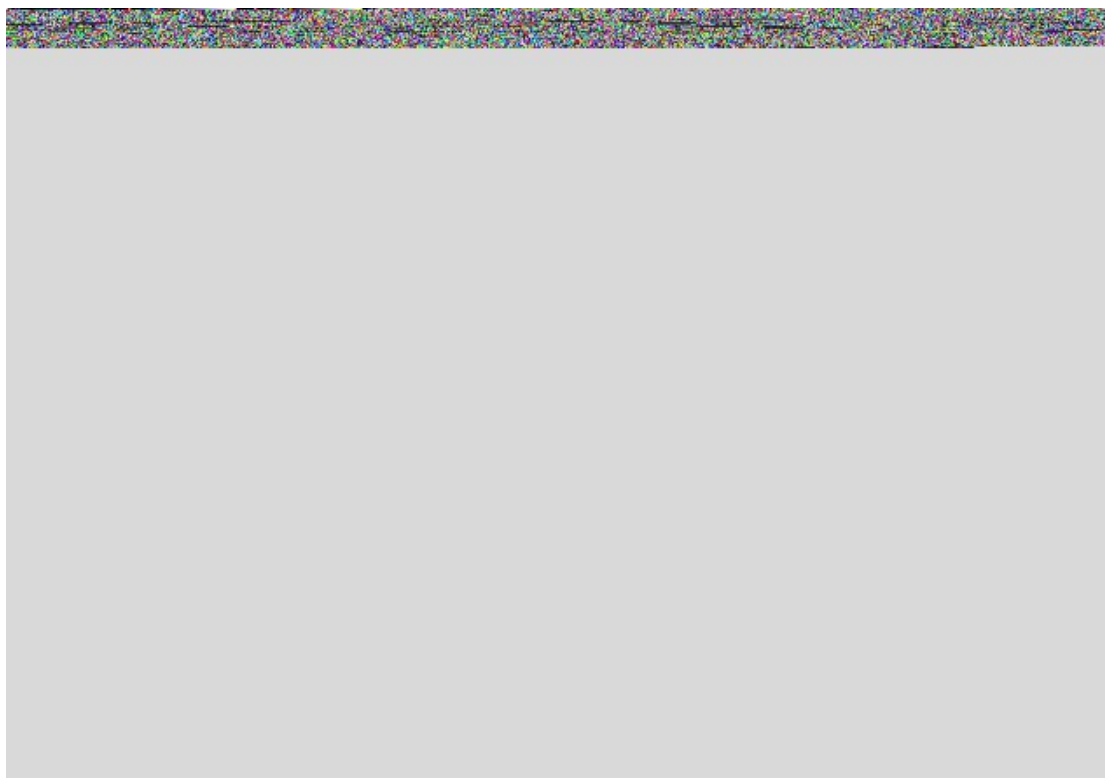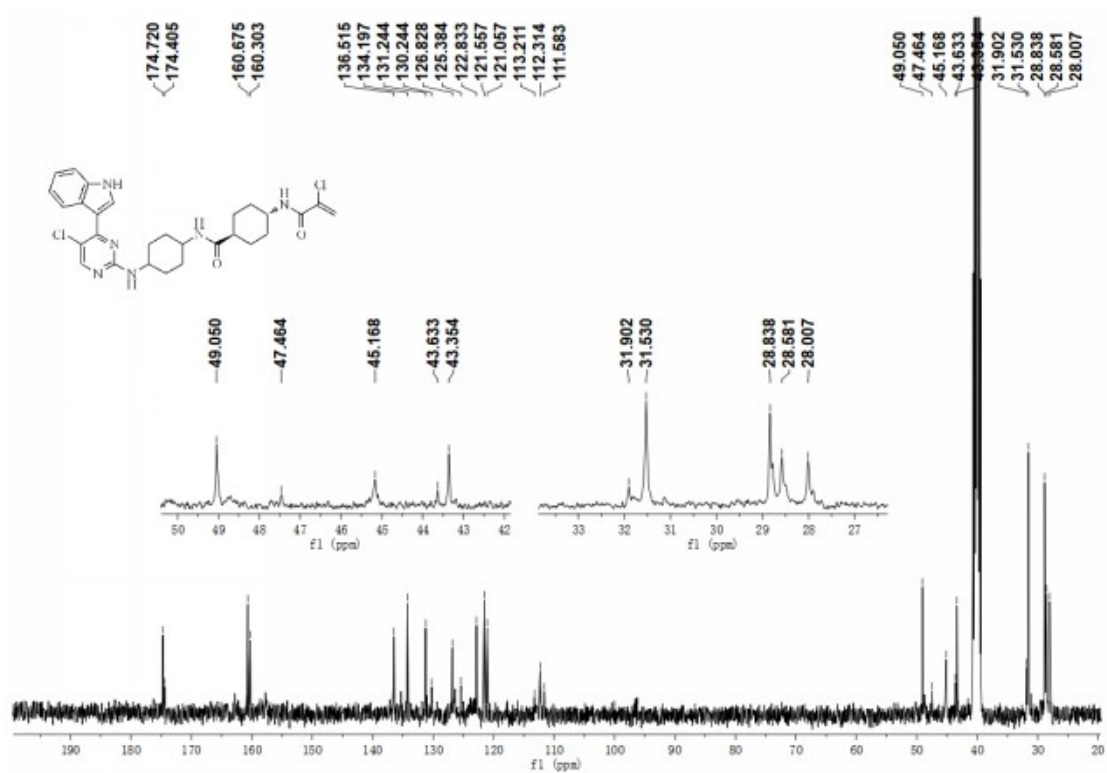

$^1\text{H}$  NMR and  $^{13}\text{C}$  NMR spectra of **B06** in  $\text{DMSO-}d_6$

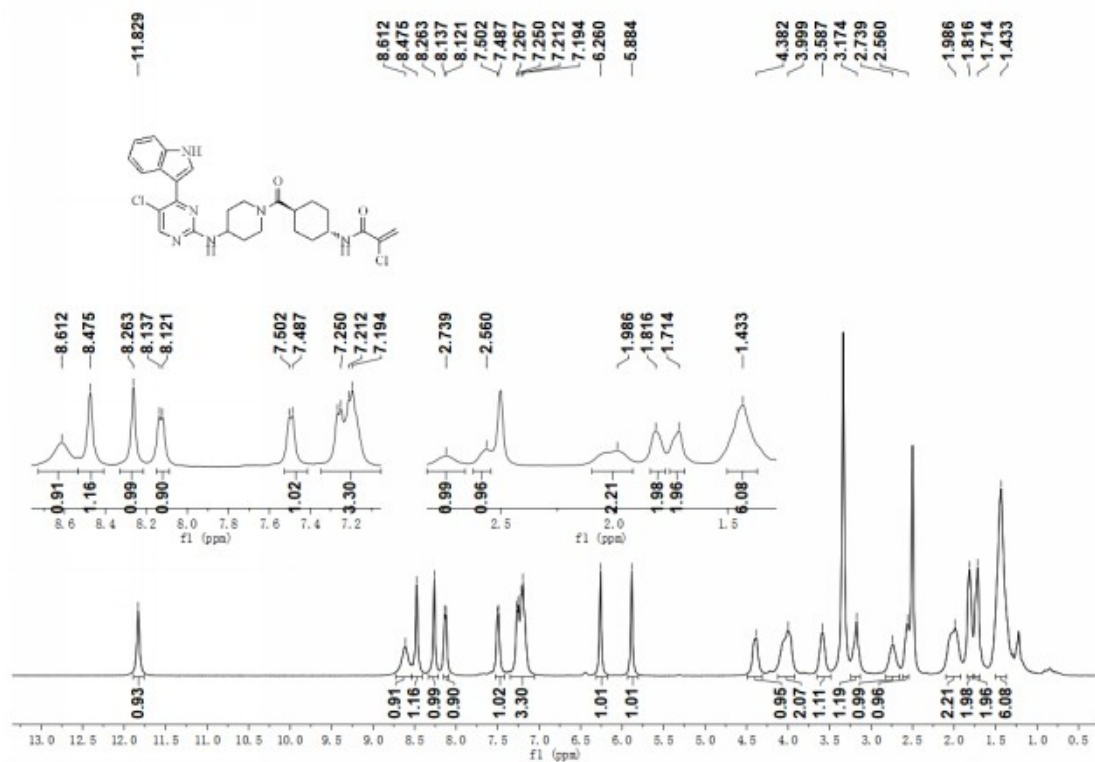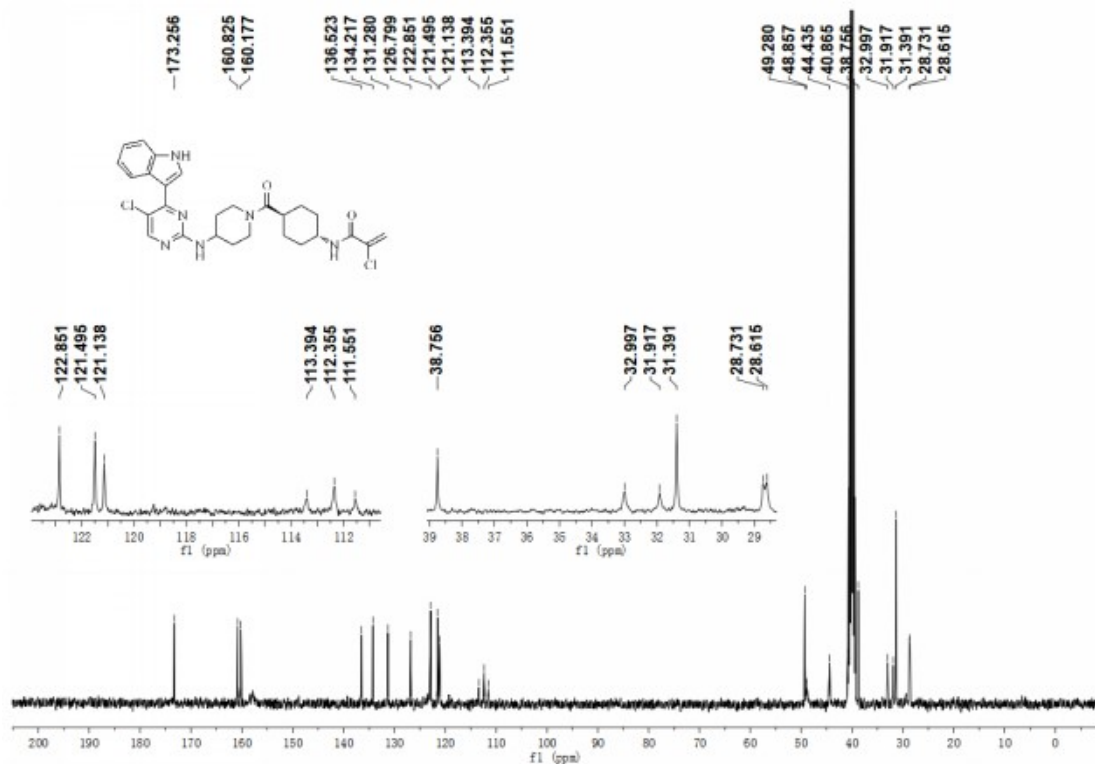

$^1\text{H}$  NMR and  $^{13}\text{C}$  NMR spectra of **B07** in  $\text{DMSO-}d_6$

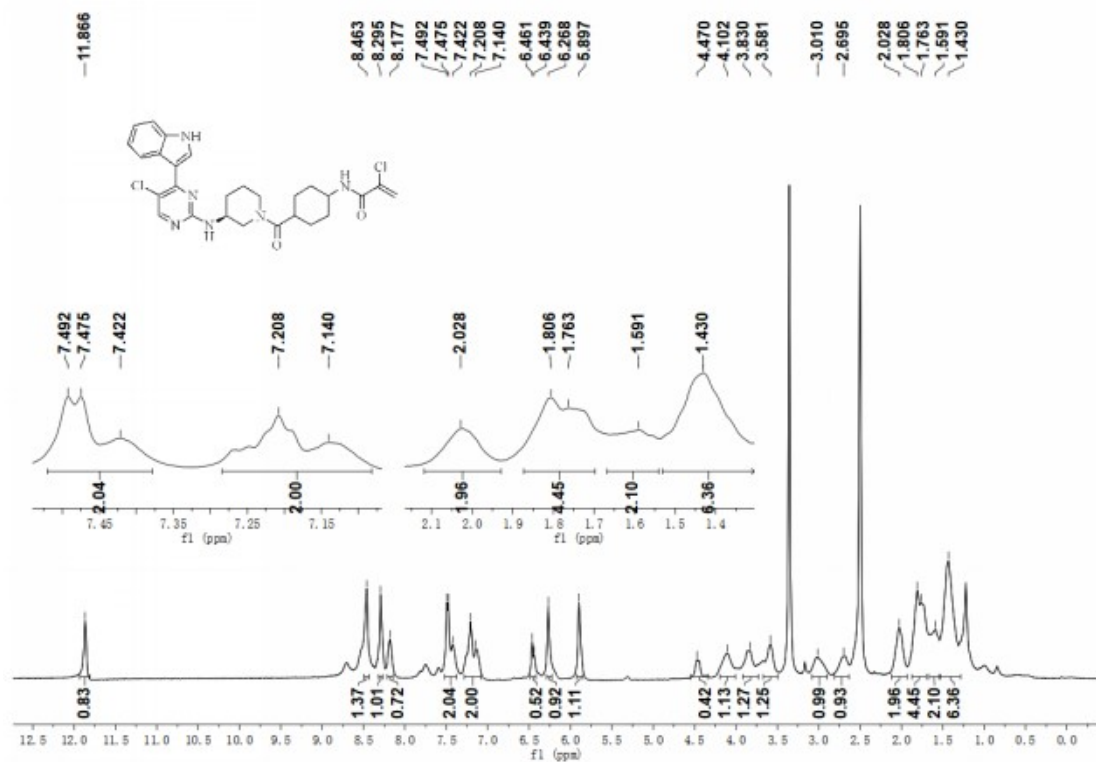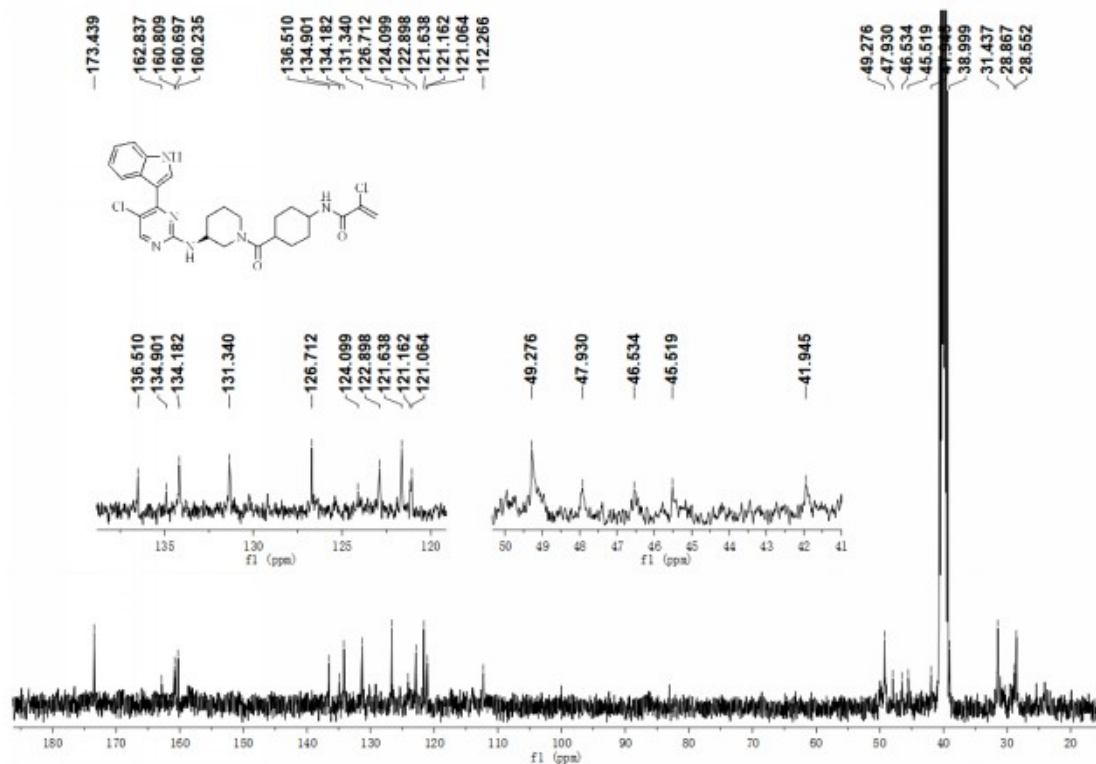

$^1\text{H}$  NMR and  $^{13}\text{C}$  NMR spectra of **B08** in  $\text{DMSO-}d_6$

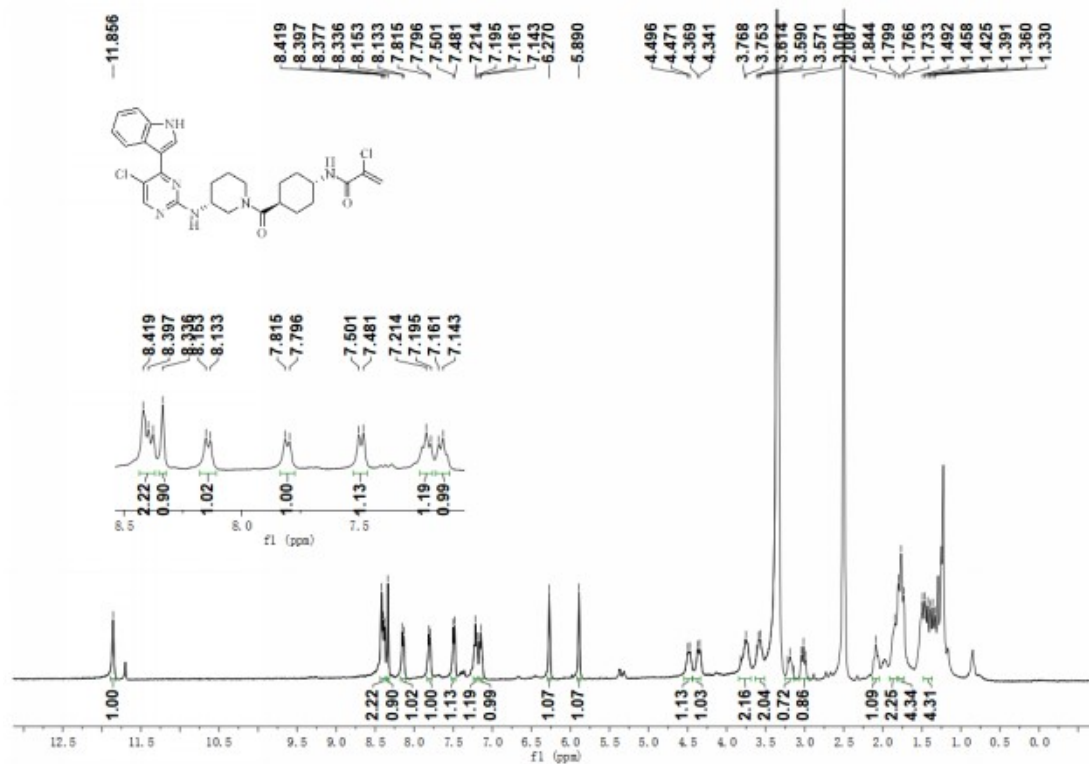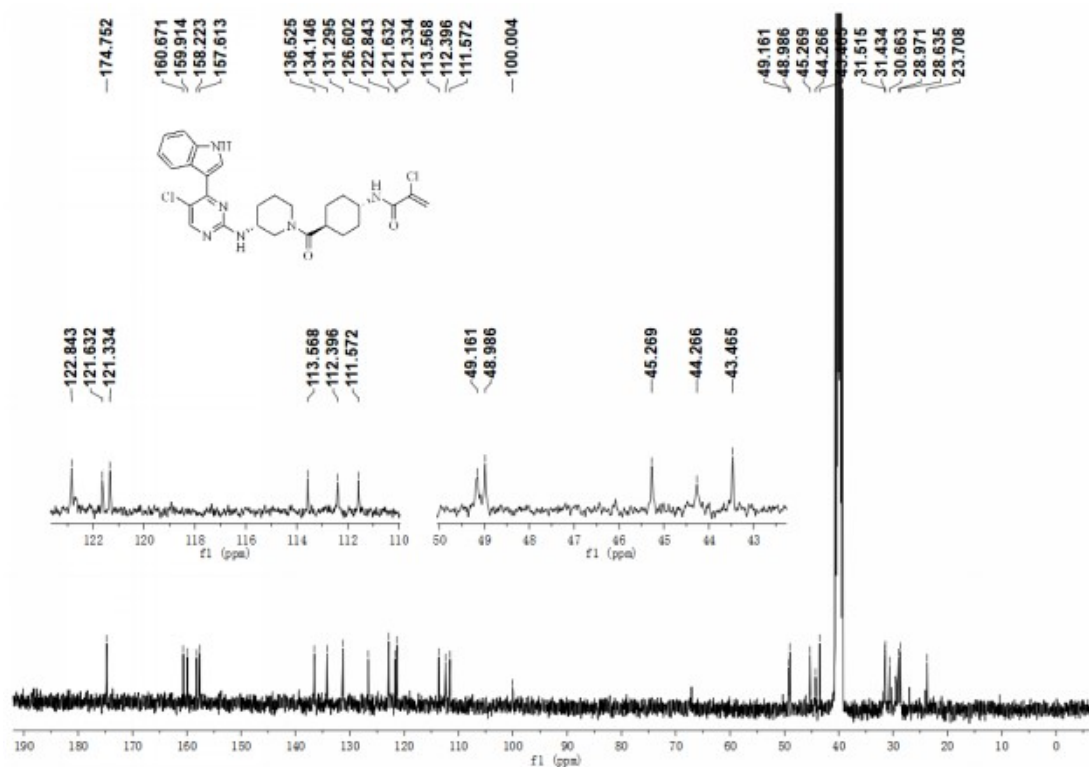

$^1\text{H}$  NMR and  $^{13}\text{C}$  NMR spectra of **B09** in  $\text{DMSO-}d_6$

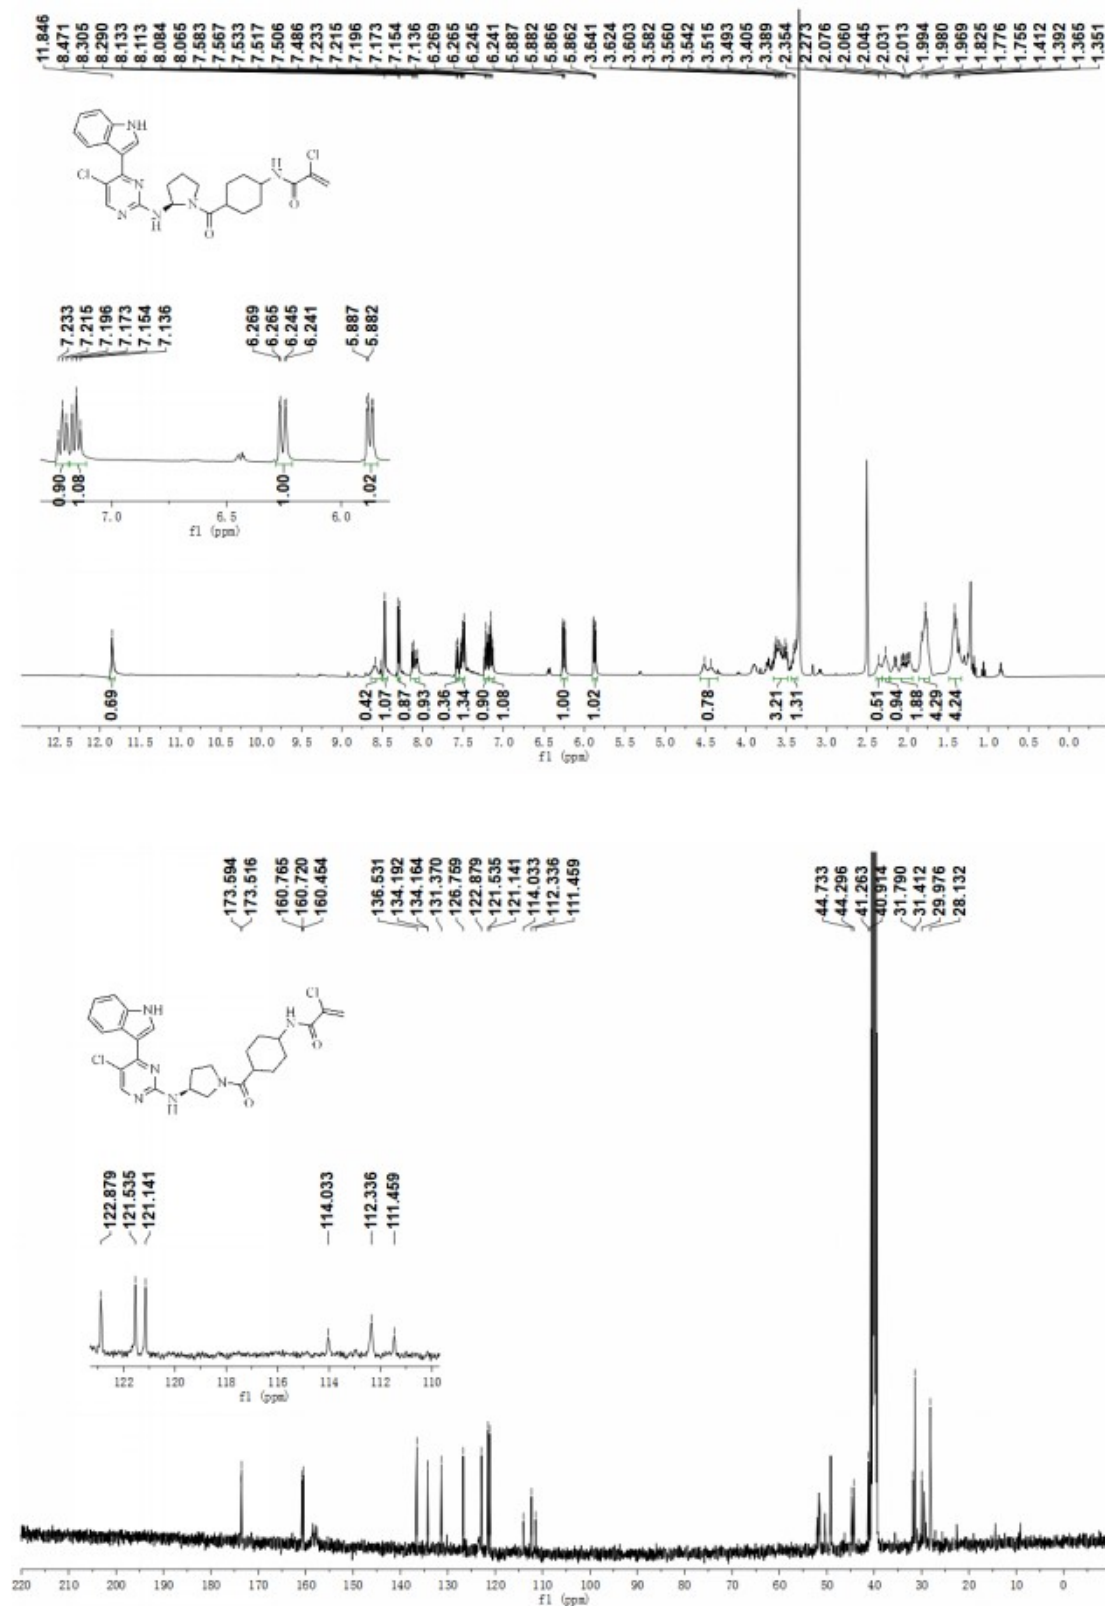

$^1\text{H}$  NMR and  $^{13}\text{C}$  NMR spectra of **B10** in  $\text{DMSO-}d_6$

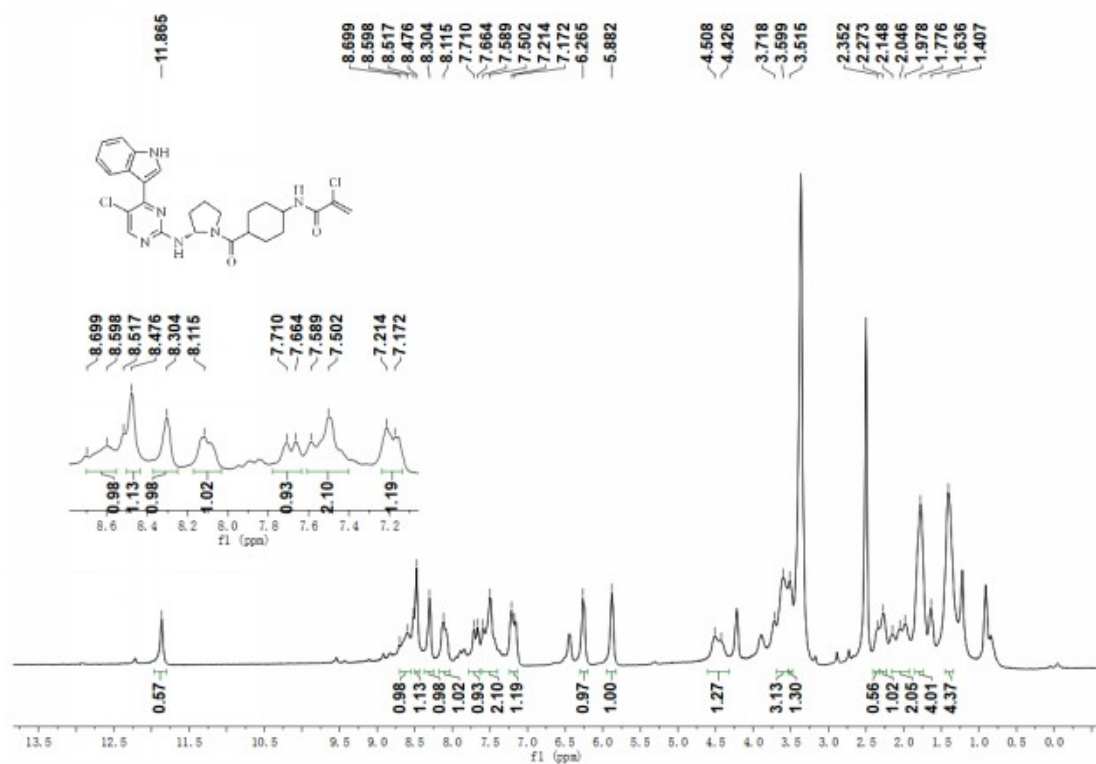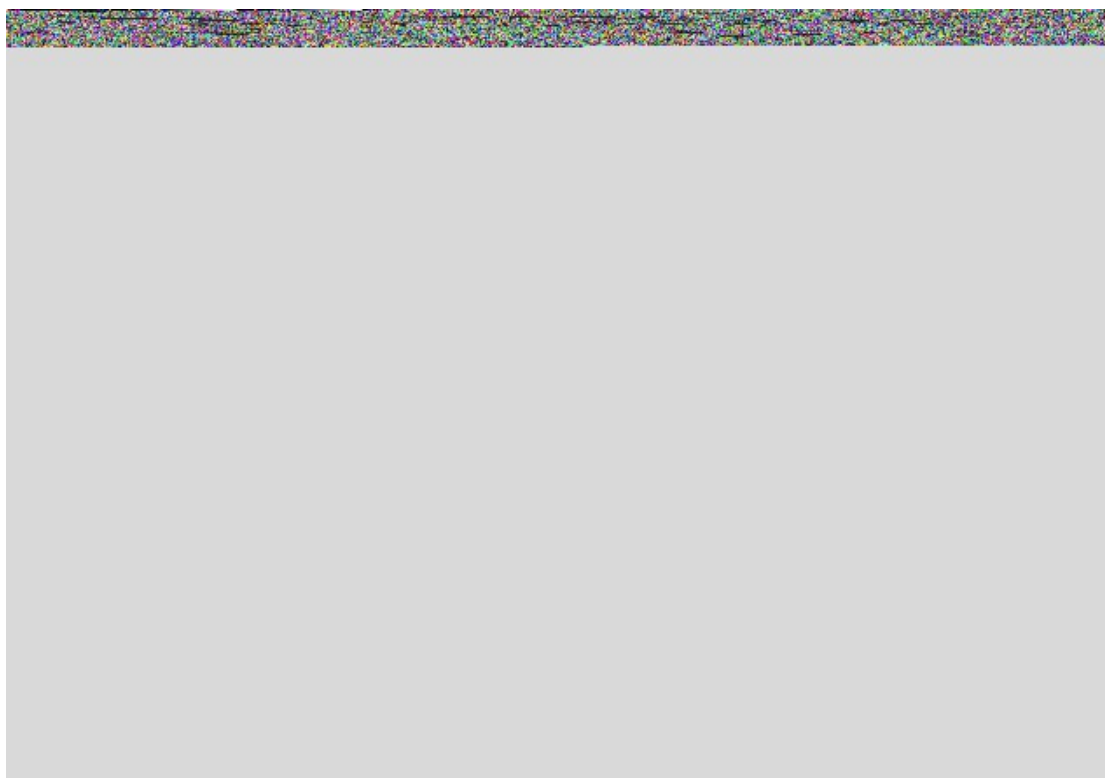

$^1\text{H}$  NMR and  $^{13}\text{C}$  NMR spectra of **B11** in  $\text{DMSO-}d_6$

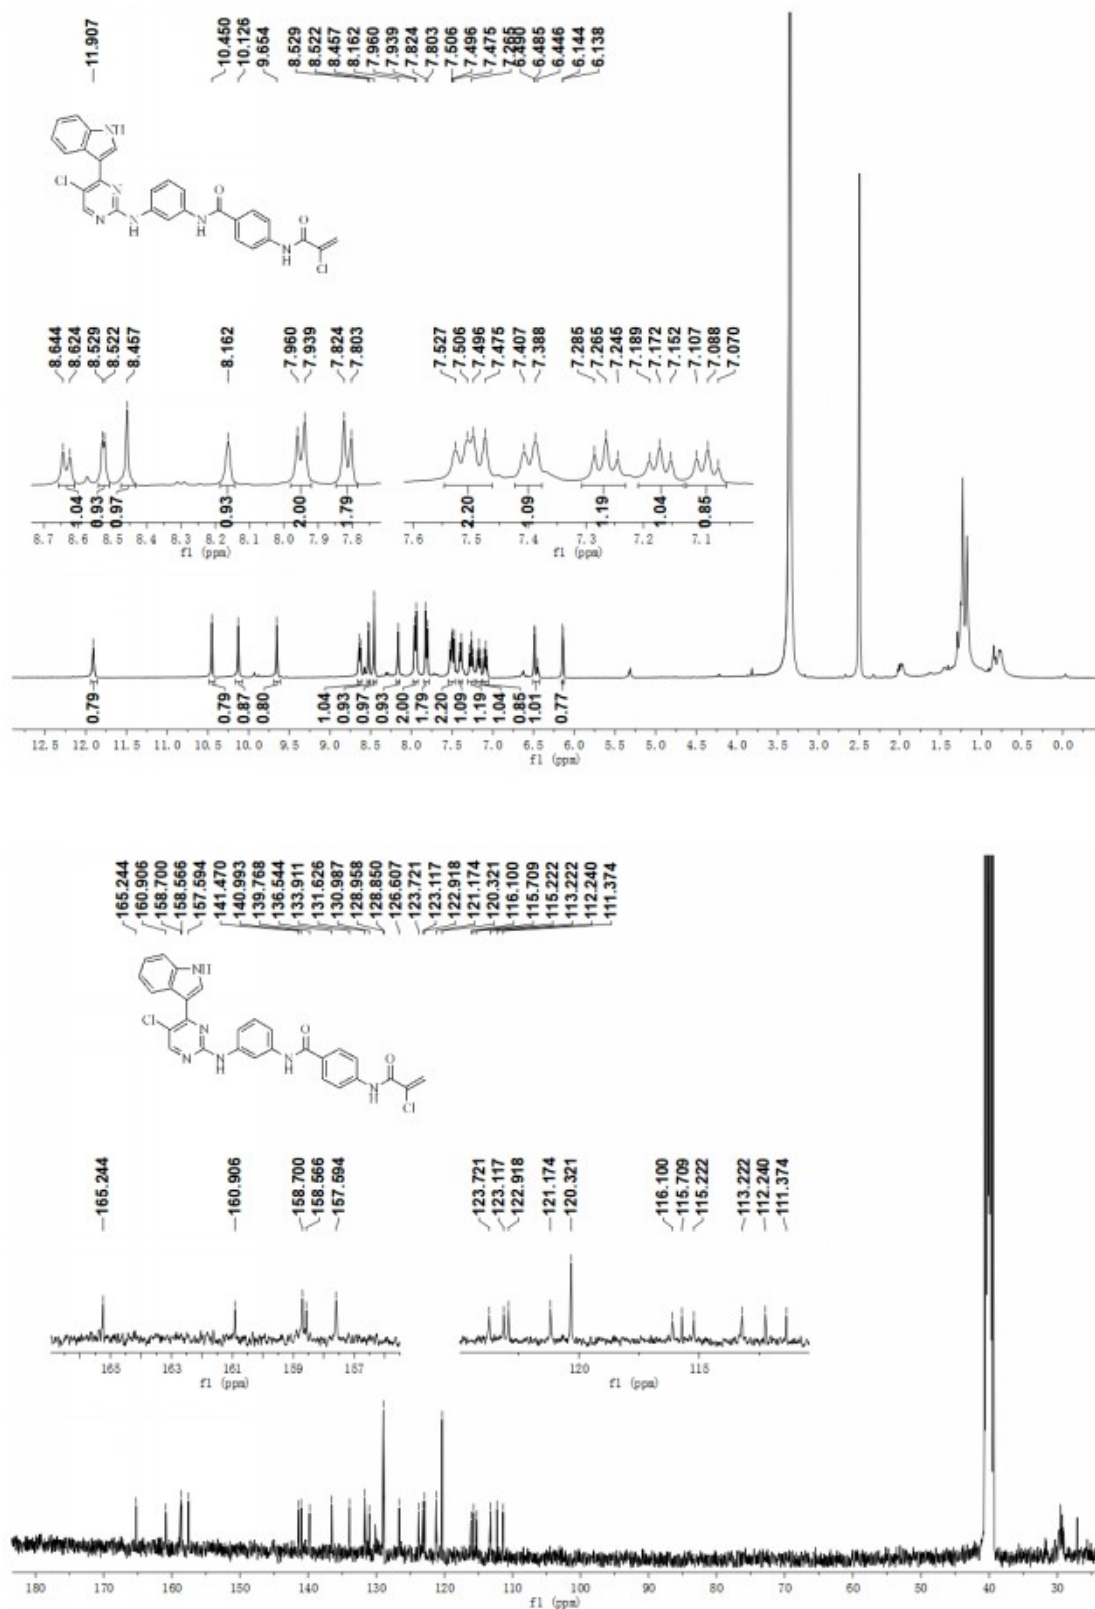

$^1\text{H}$  NMR and  $^{13}\text{C}$  NMR spectra of **B12** in  $\text{DMSO-}d_6$

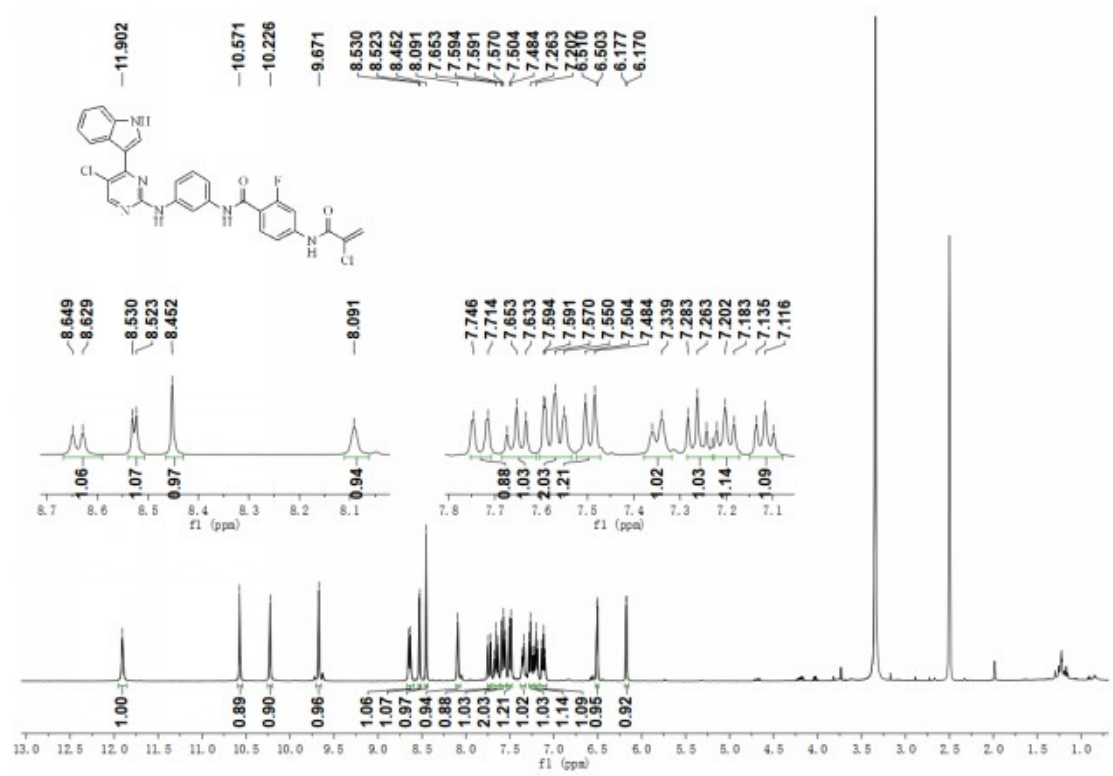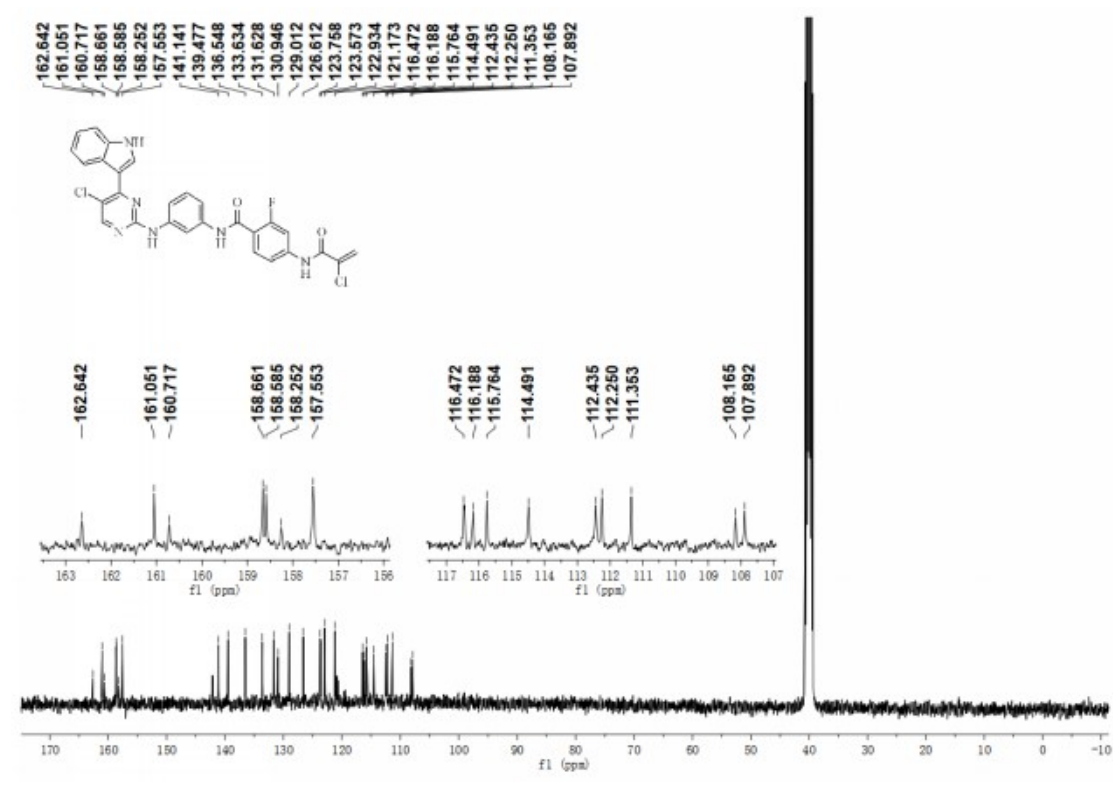

$^1\text{H}$  NMR and  $^{13}\text{C}$  NMR spectra of **B13** in  $\text{DMSO-}d_6$

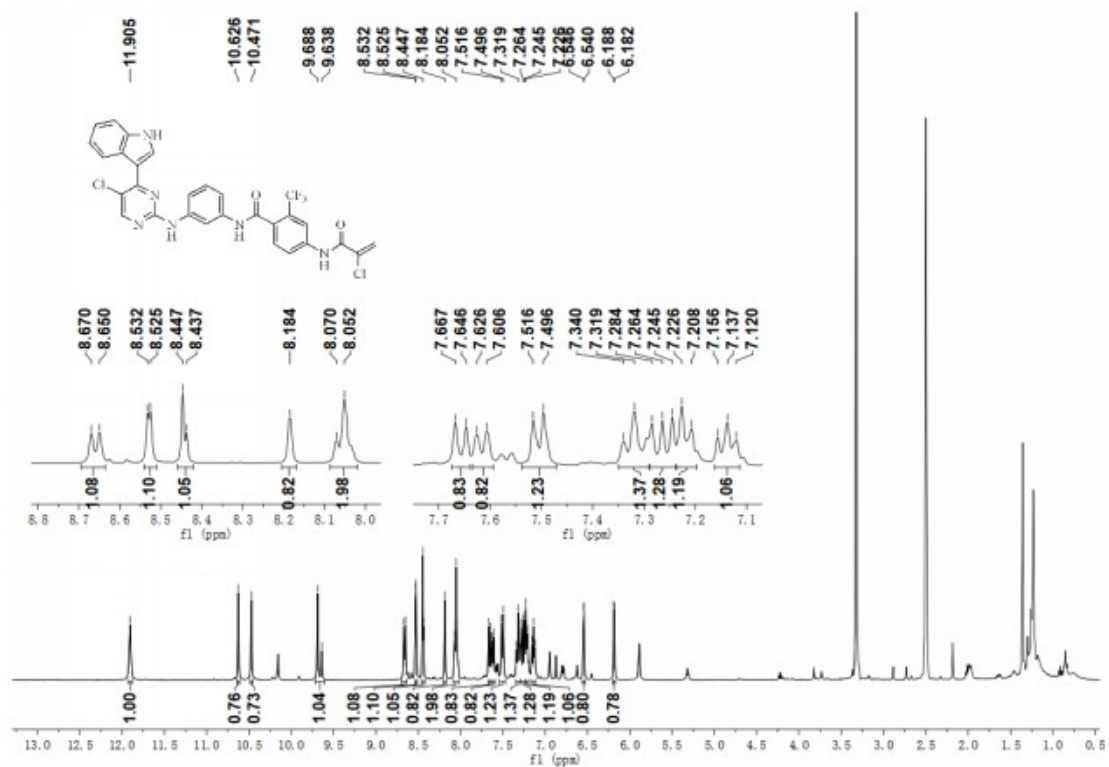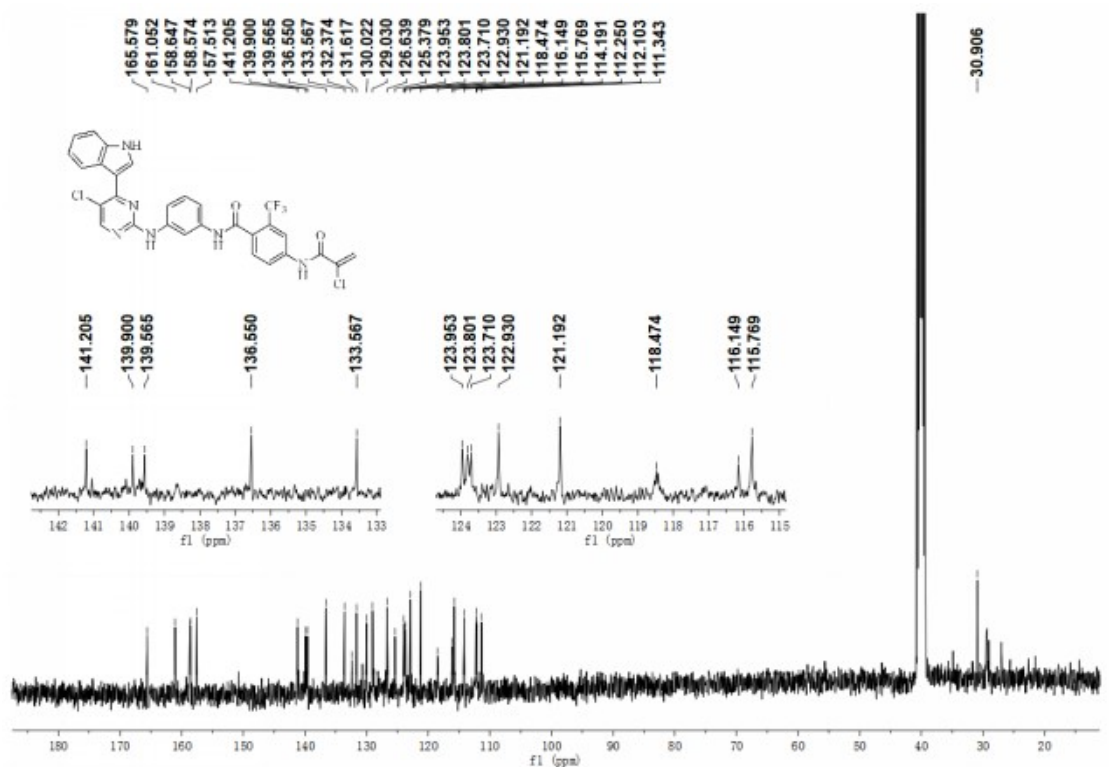

$^1\text{H}$  NMR and  $^{13}\text{C}$  NMR spectra of **B14** in  $\text{DMSO-}d_6$

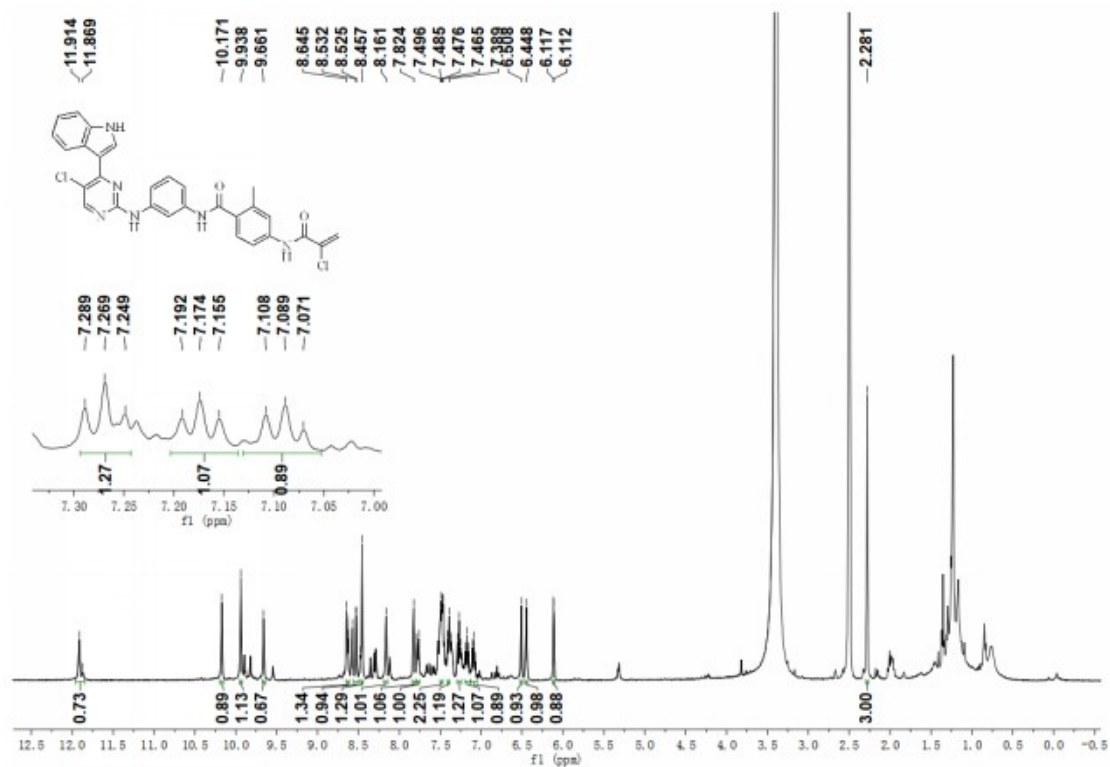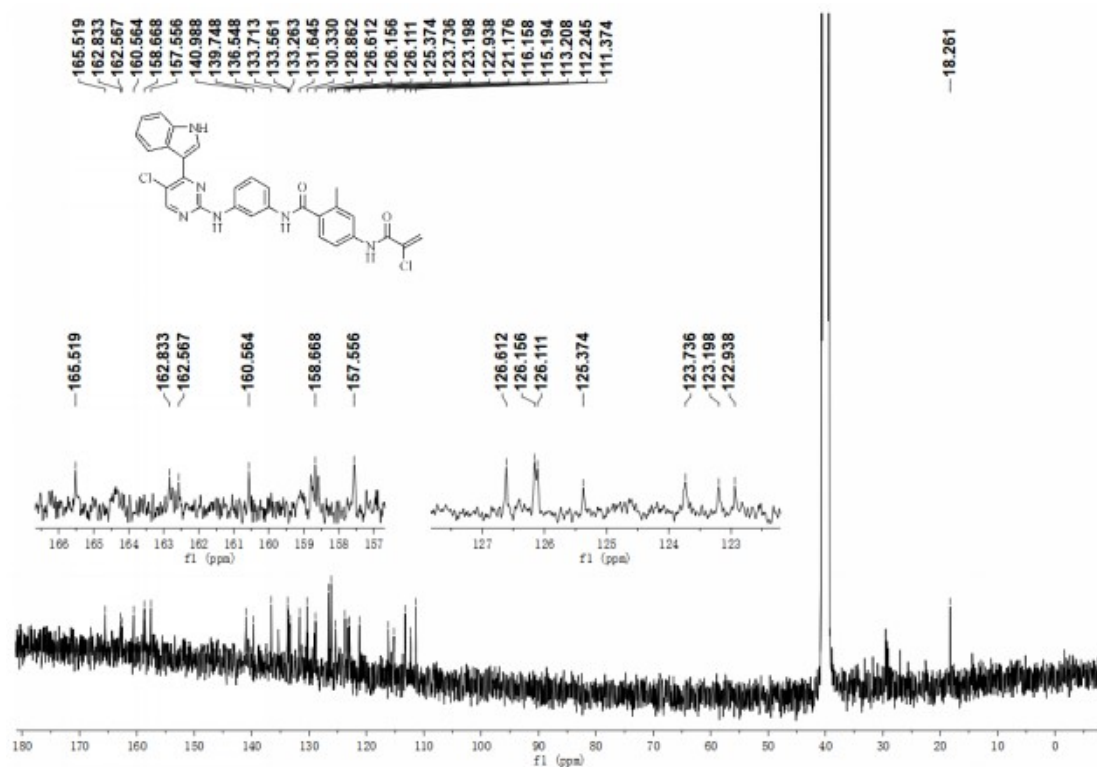

$^1\text{H}$  NMR and  $^{13}\text{C}$  NMR spectra of **B15** in  $\text{DMSO-}d_6$

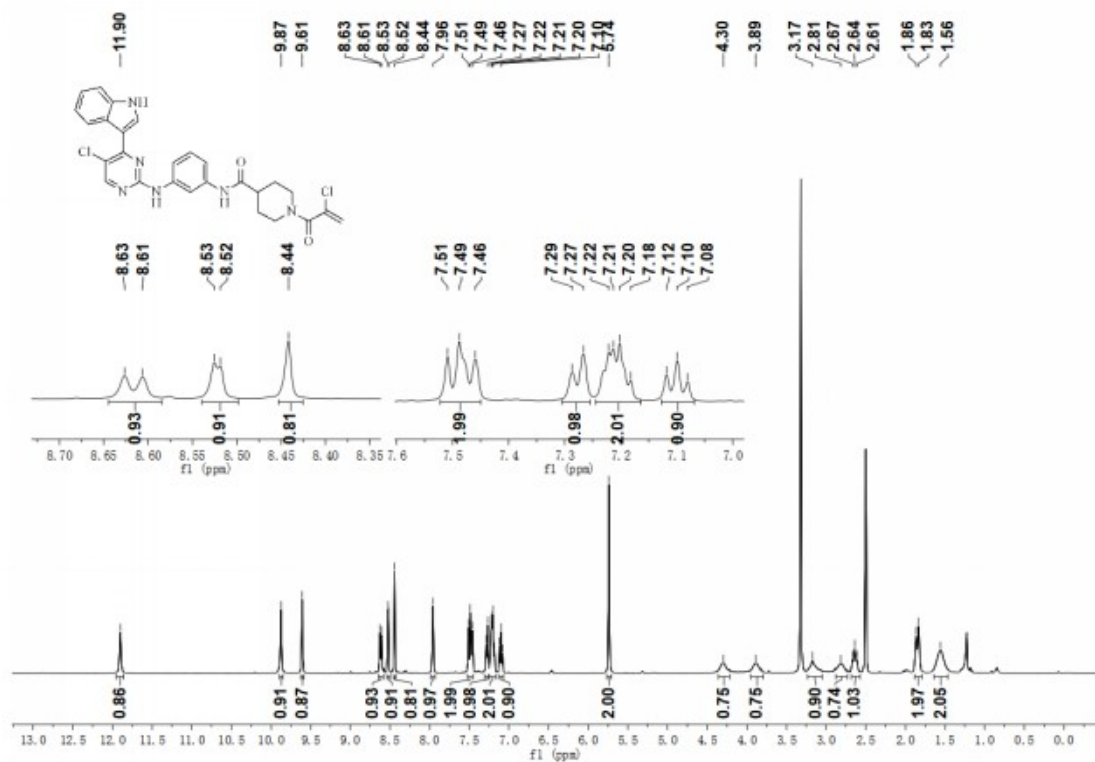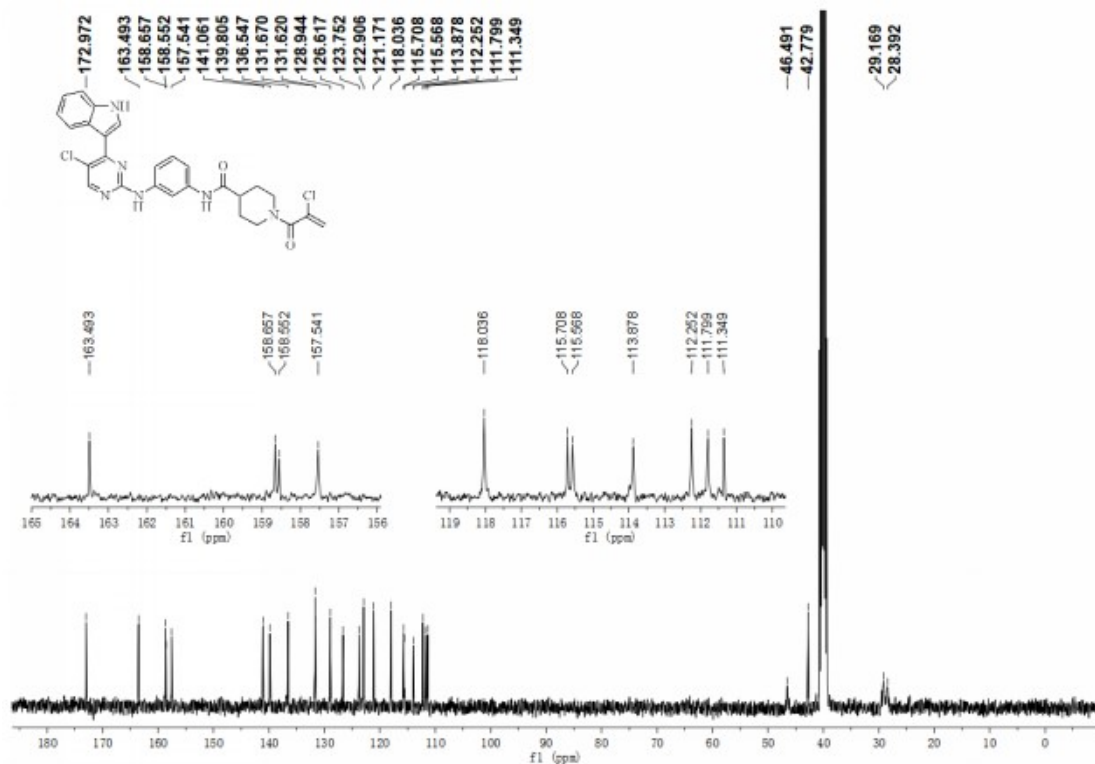

$^1\text{H}$  NMR and  $^{13}\text{C}$  NMR spectra of **B16** in  $\text{DMSO-}d_6$

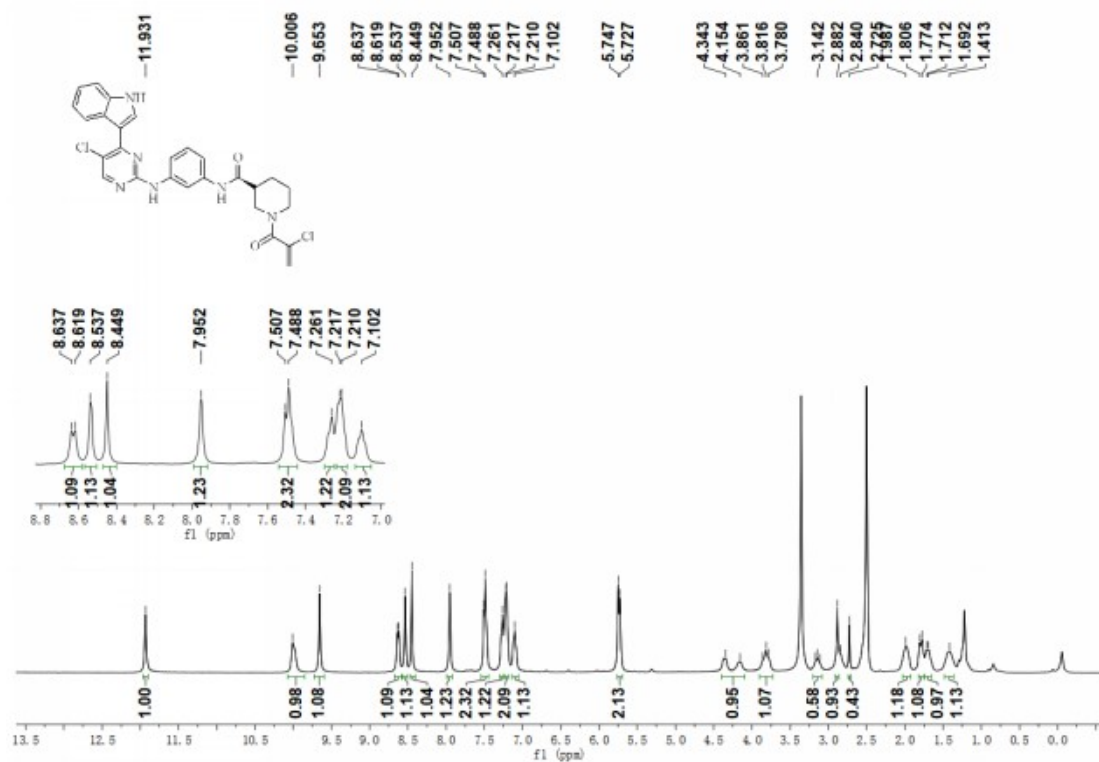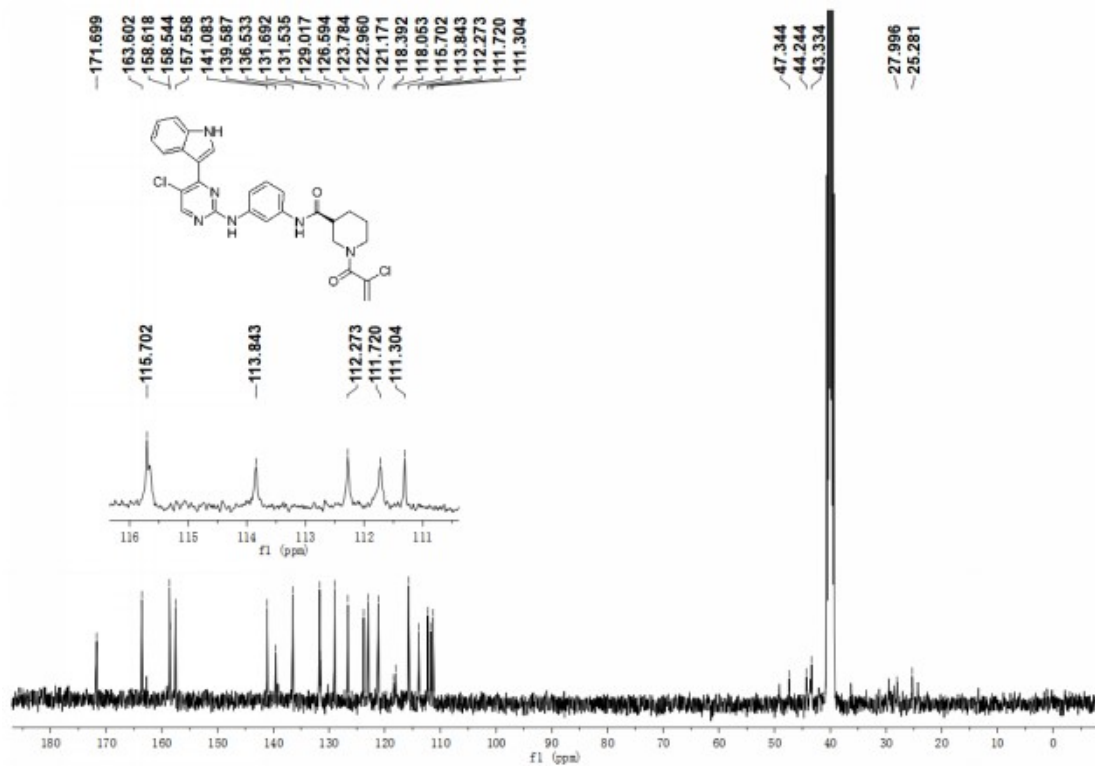

$^1\text{H}$  NMR and  $^{13}\text{C}$  NMR spectra of **B17** in  $\text{DMSO-}d_6$

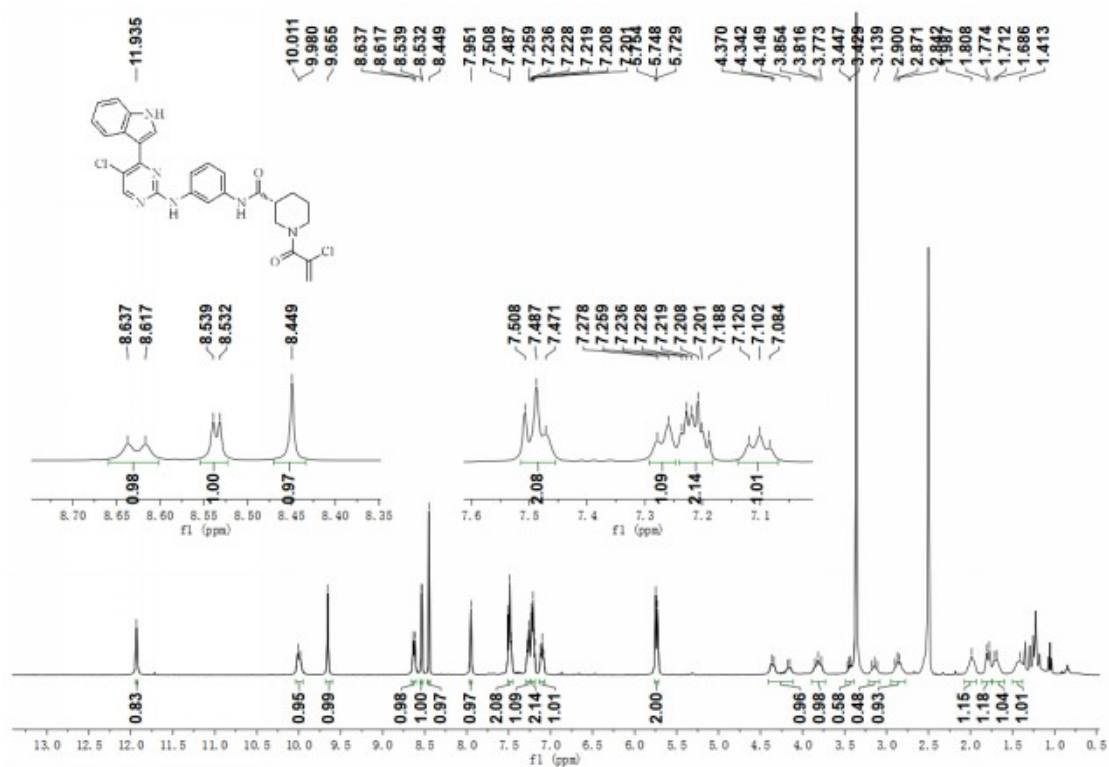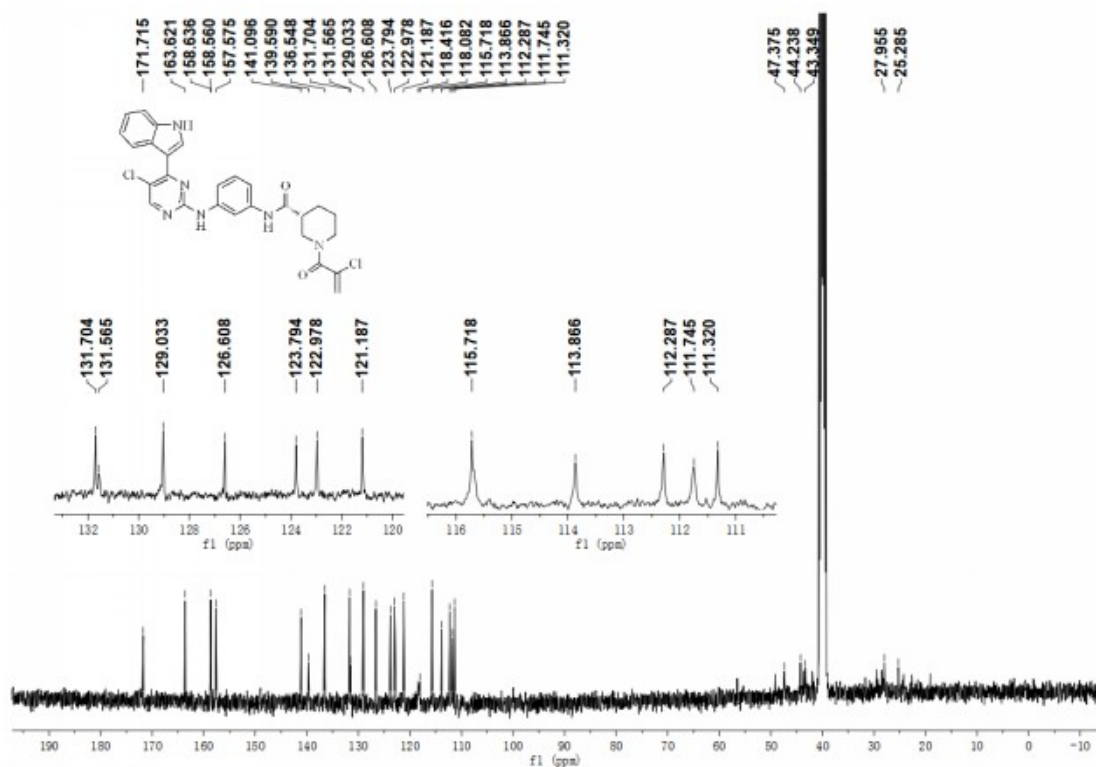

$^1\text{H}$  NMR and  $^{13}\text{C}$  NMR spectra of **B18** in  $\text{DMSO-}d_6$

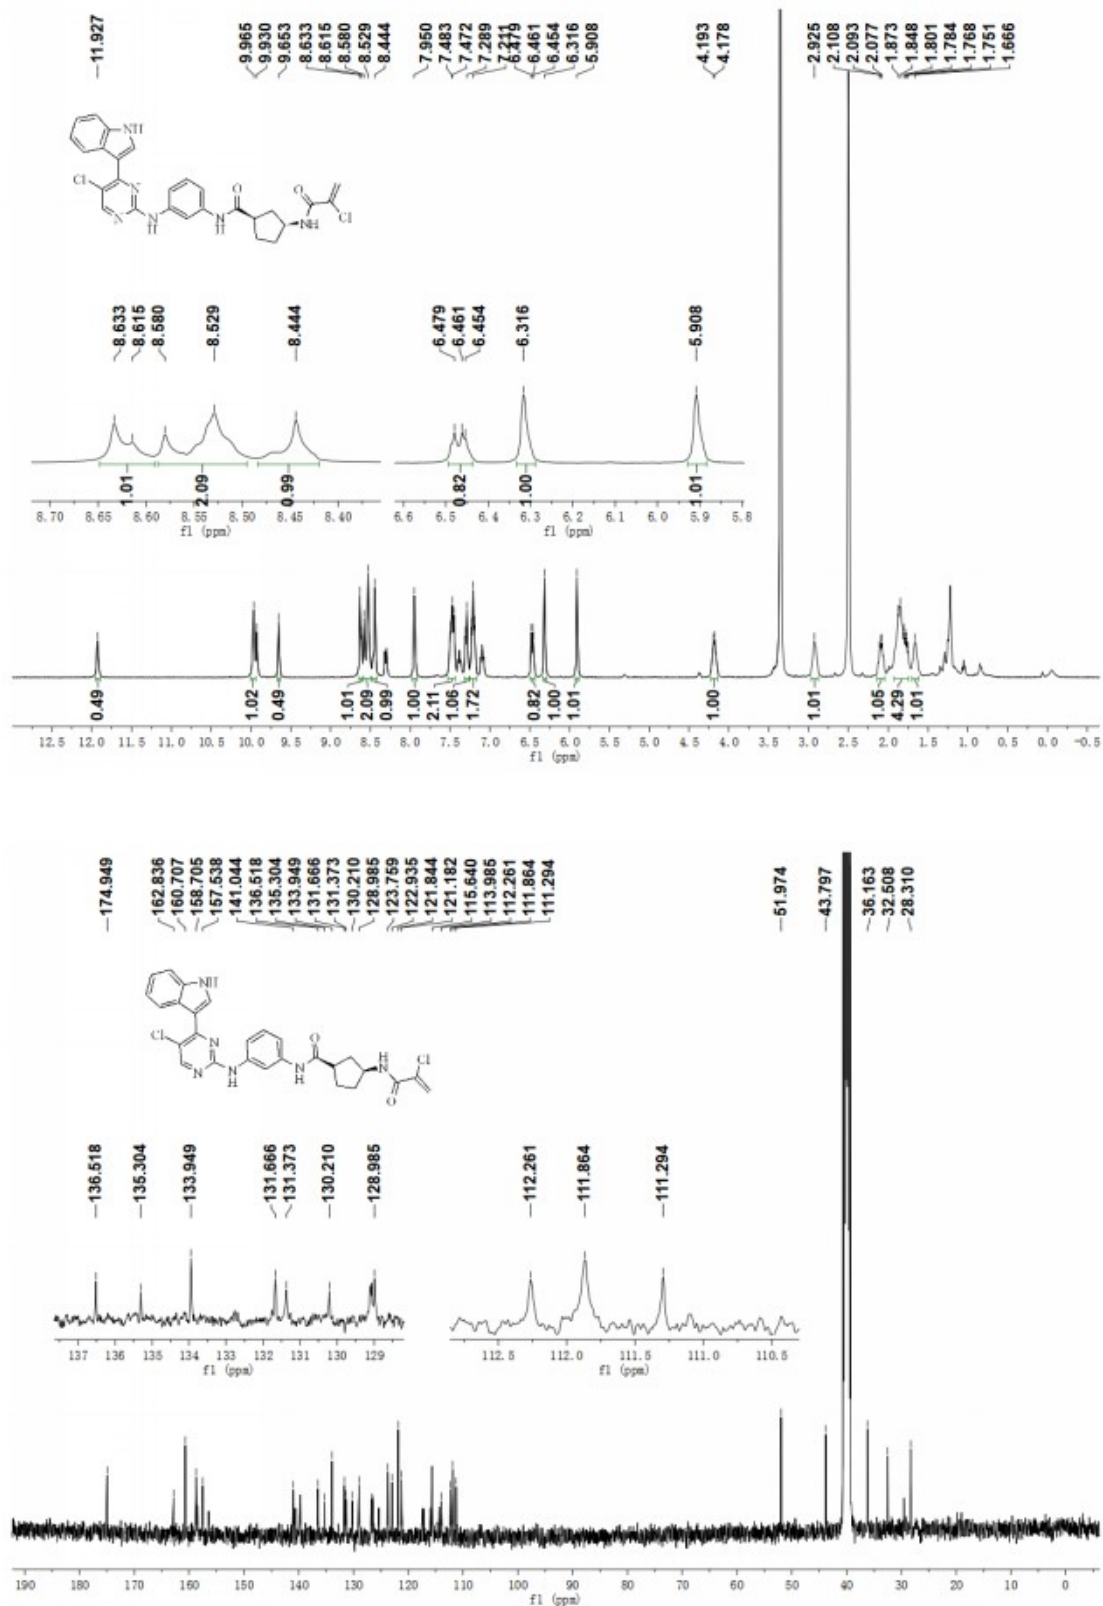

$^1\text{H}$  NMR and  $^{13}\text{C}$  NMR spectra of **B19** in  $\text{DMSO-}d_6$

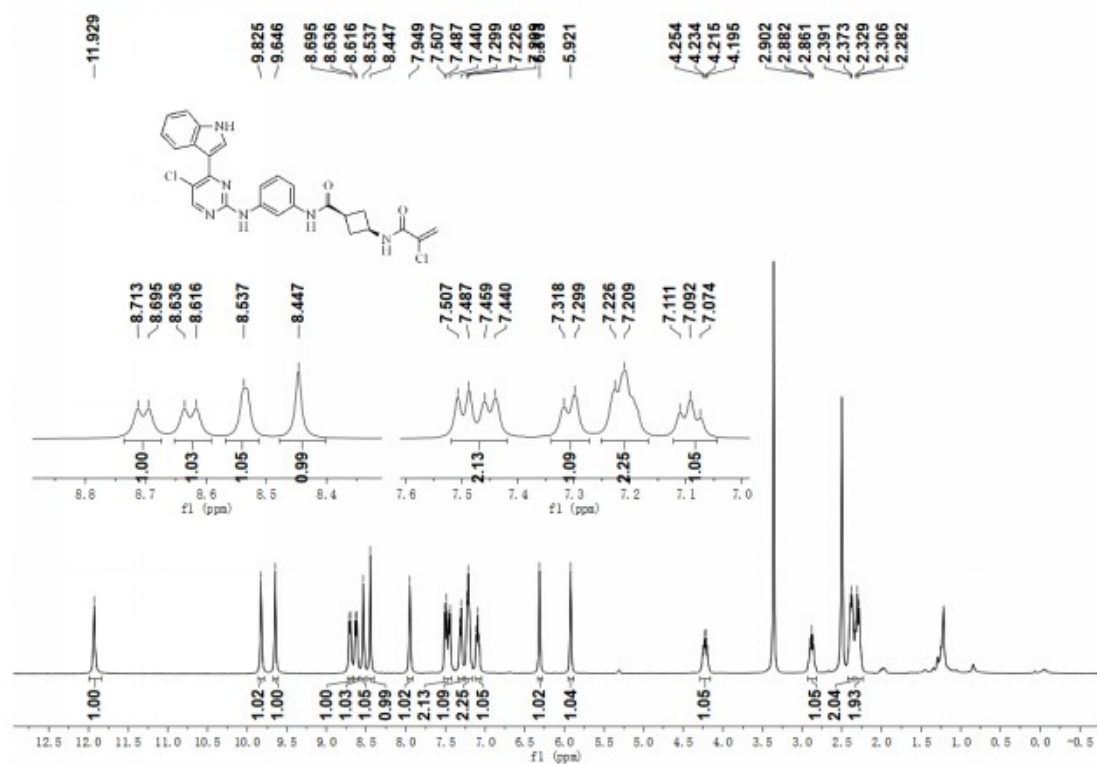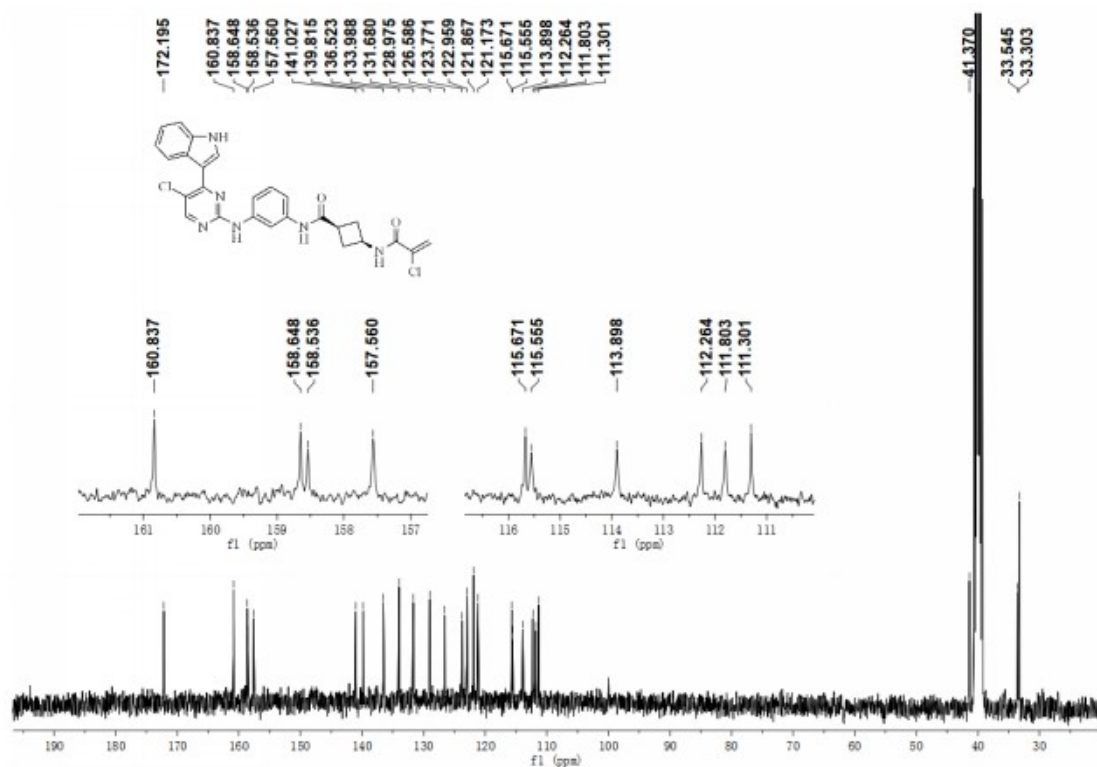

$^1\text{H}$  NMR and  $^{13}\text{C}$  NMR spectra of **B20** in  $\text{DMSO-}d_6$

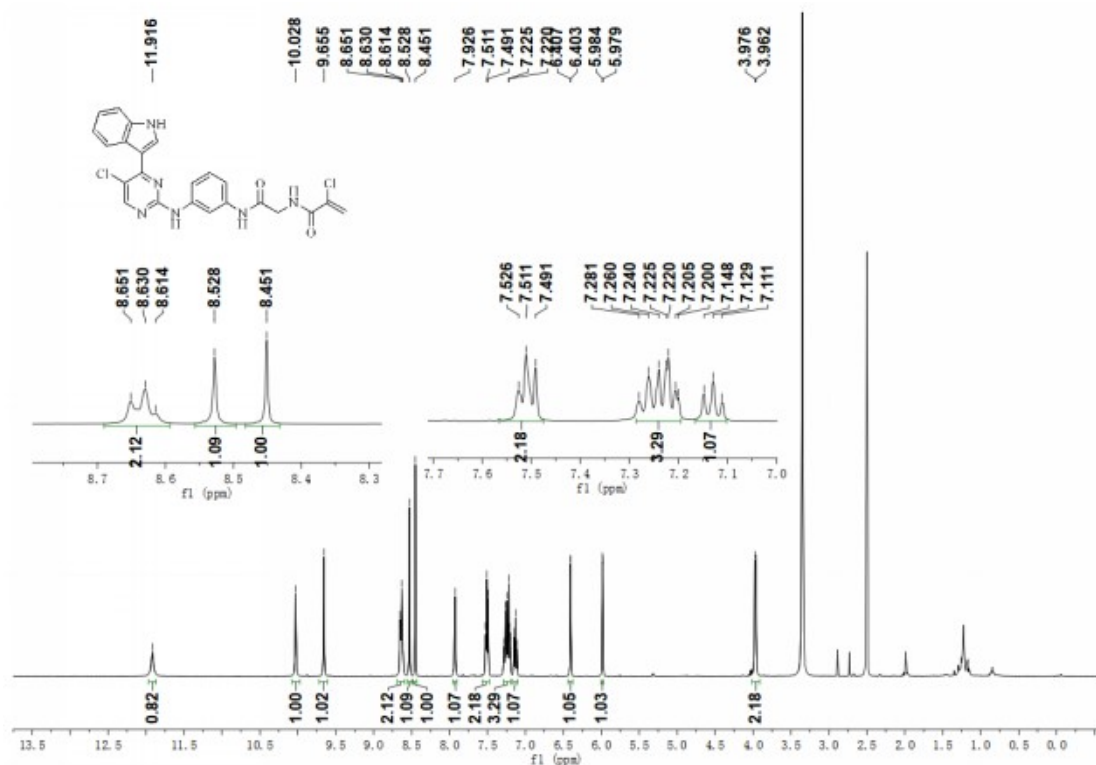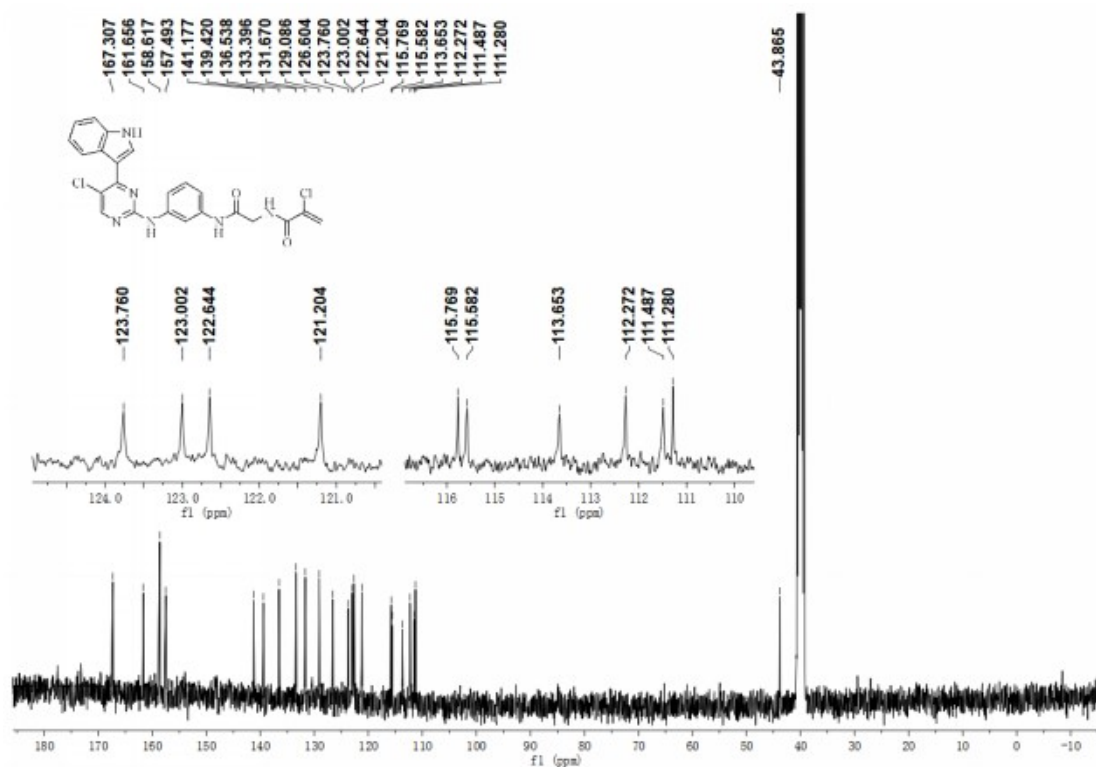

$^1\text{H}$  NMR and  $^{13}\text{C}$  NMR spectra of **B21** in  $\text{DMSO-}d_6$

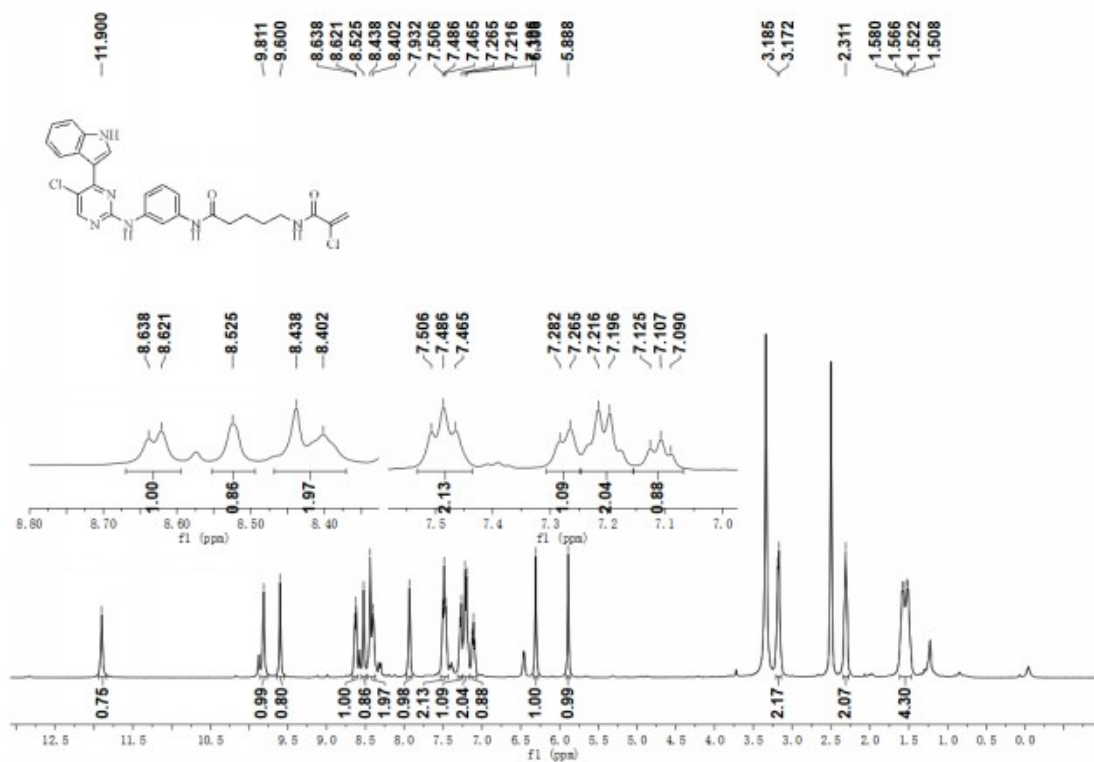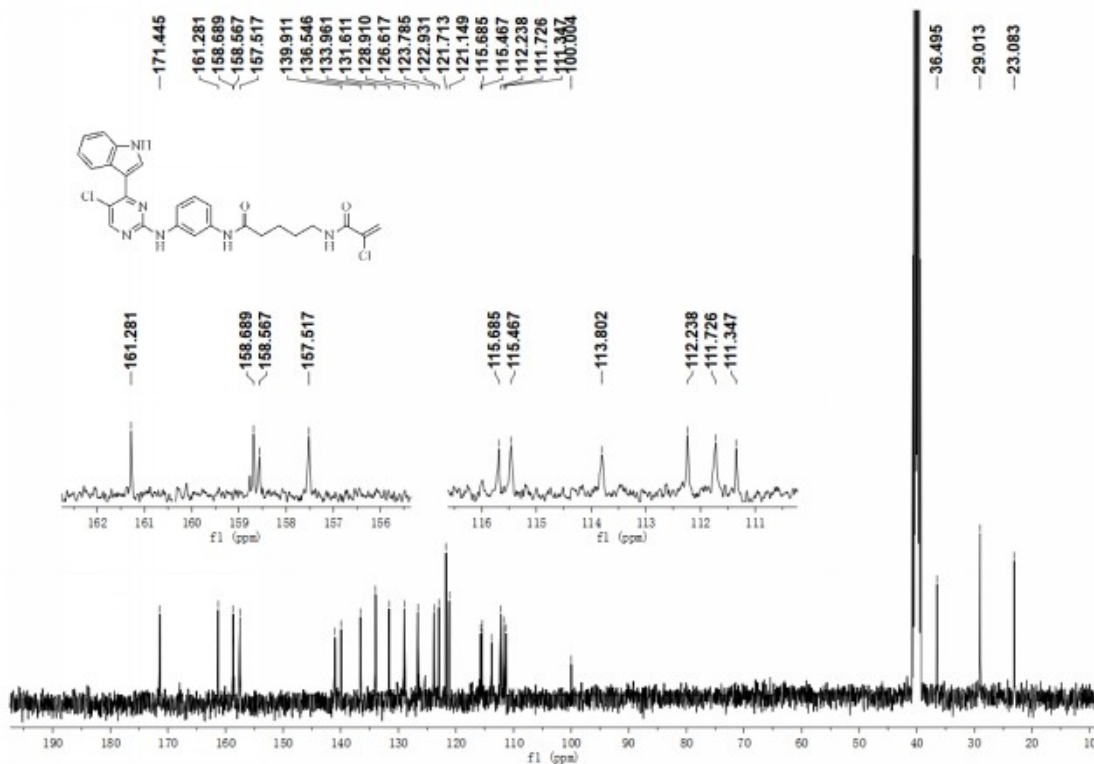

$^1\text{H}$  NMR and  $^{13}\text{C}$  NMR spectra of **B22** in  $\text{DMSO-}d_6$

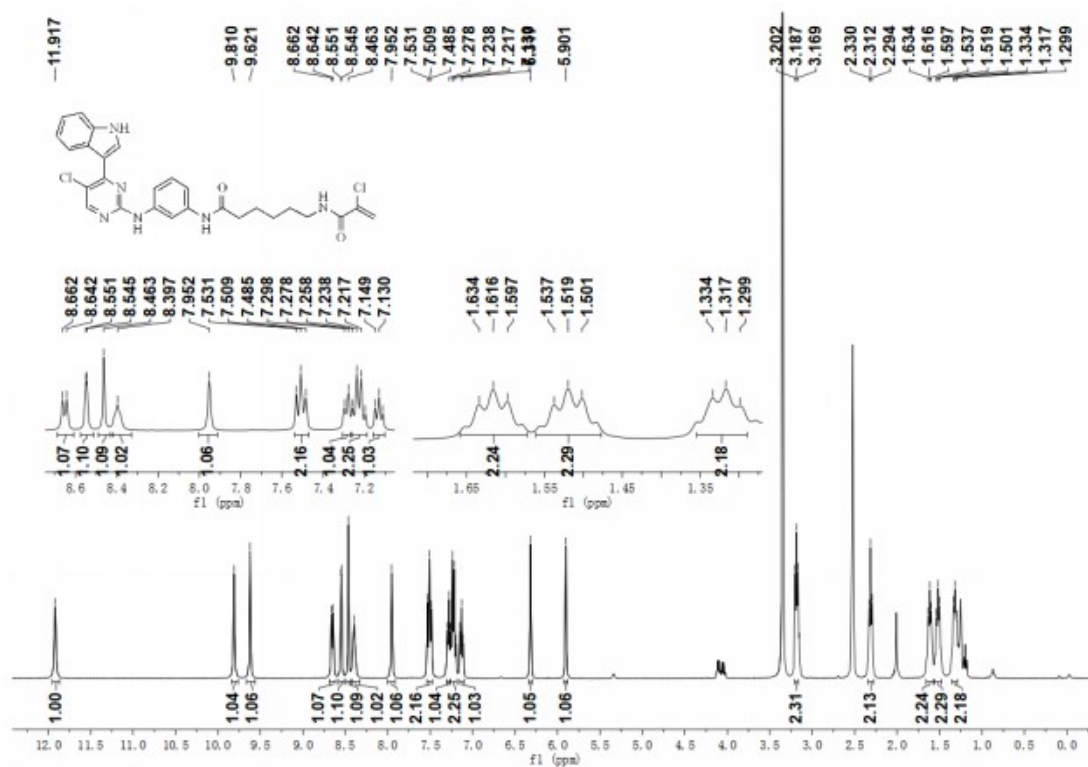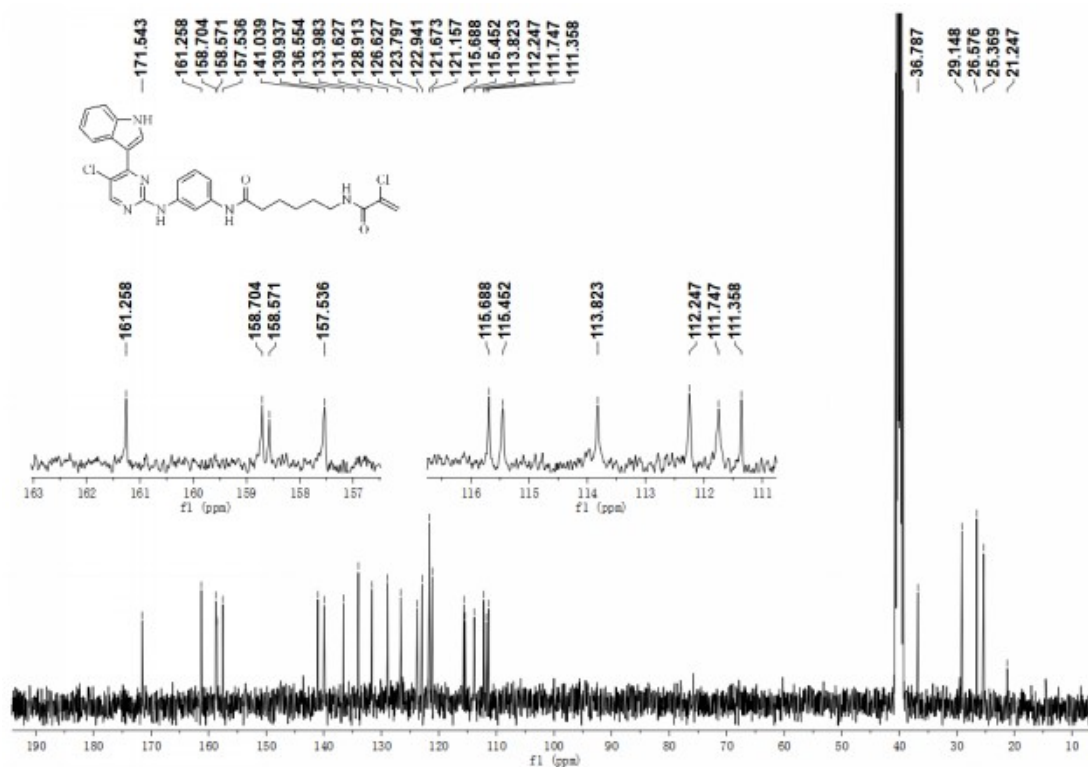

$^1\text{H}$  NMR and  $^{13}\text{C}$  NMR spectra of **B23** in  $\text{DMSO-}d_6$

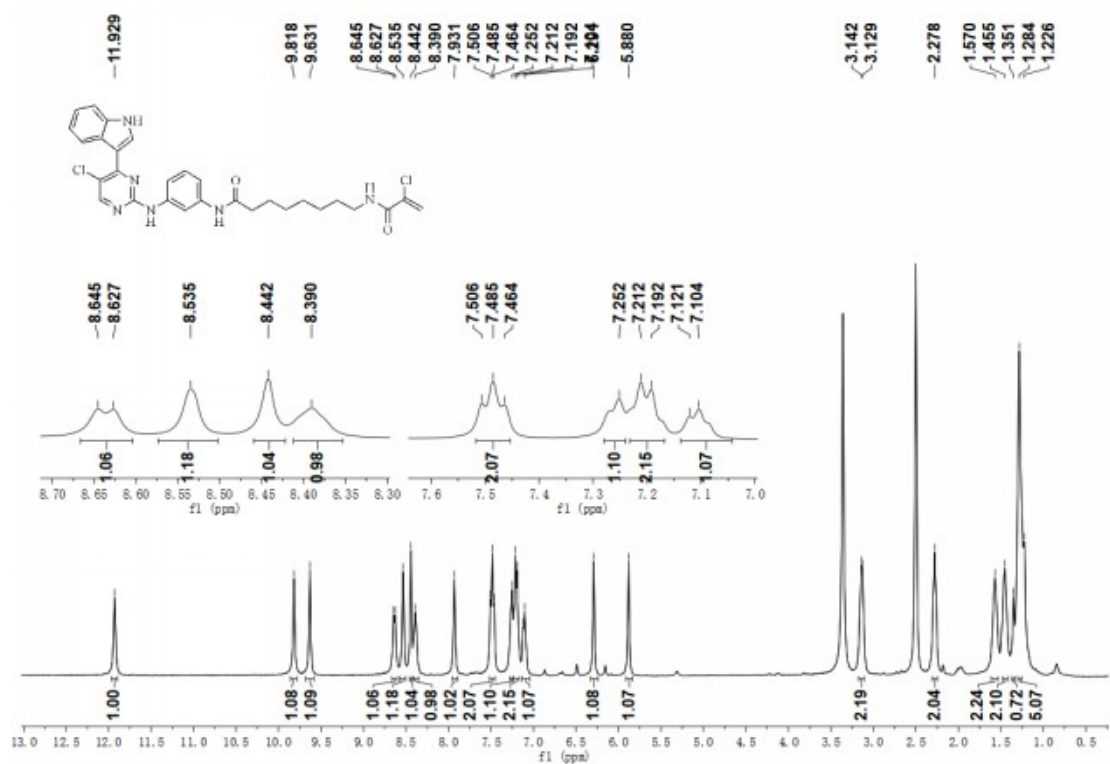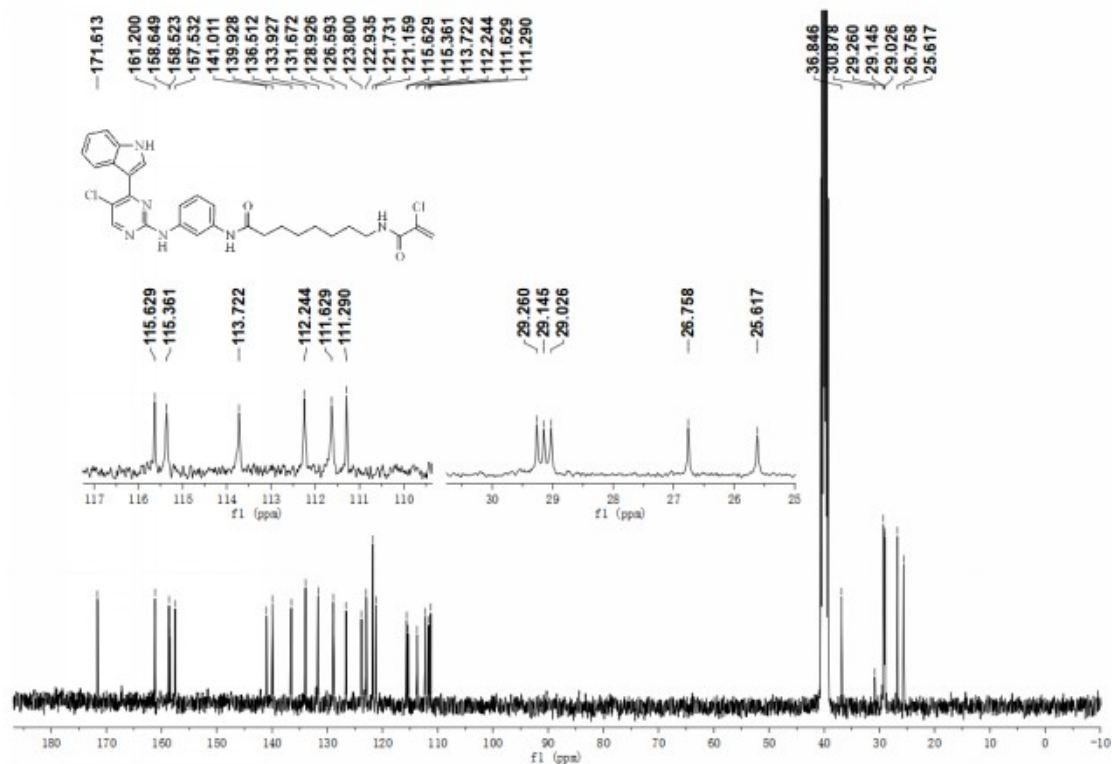

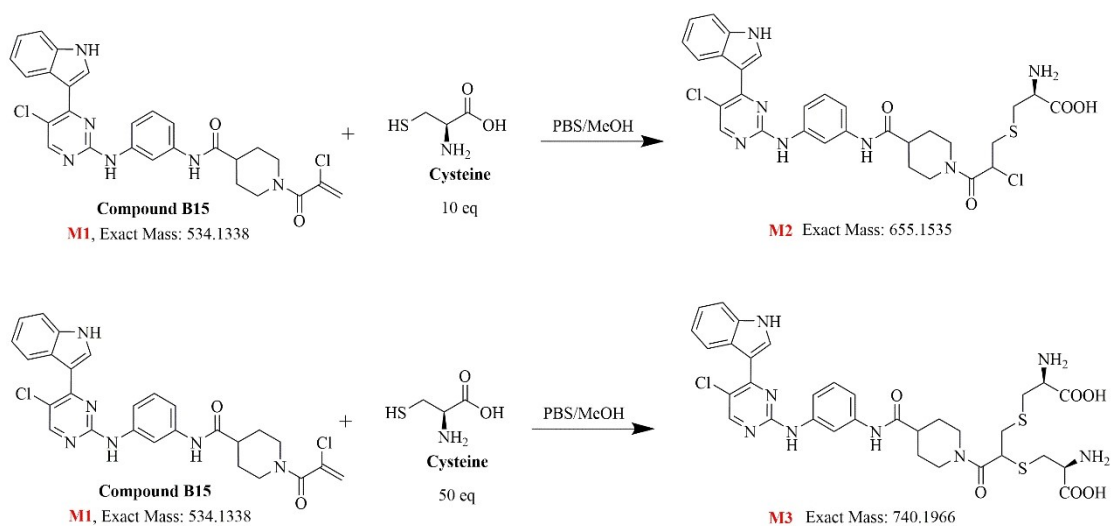

**Figure S1. Covalent bond formation of B15 and Cysteine residue.**

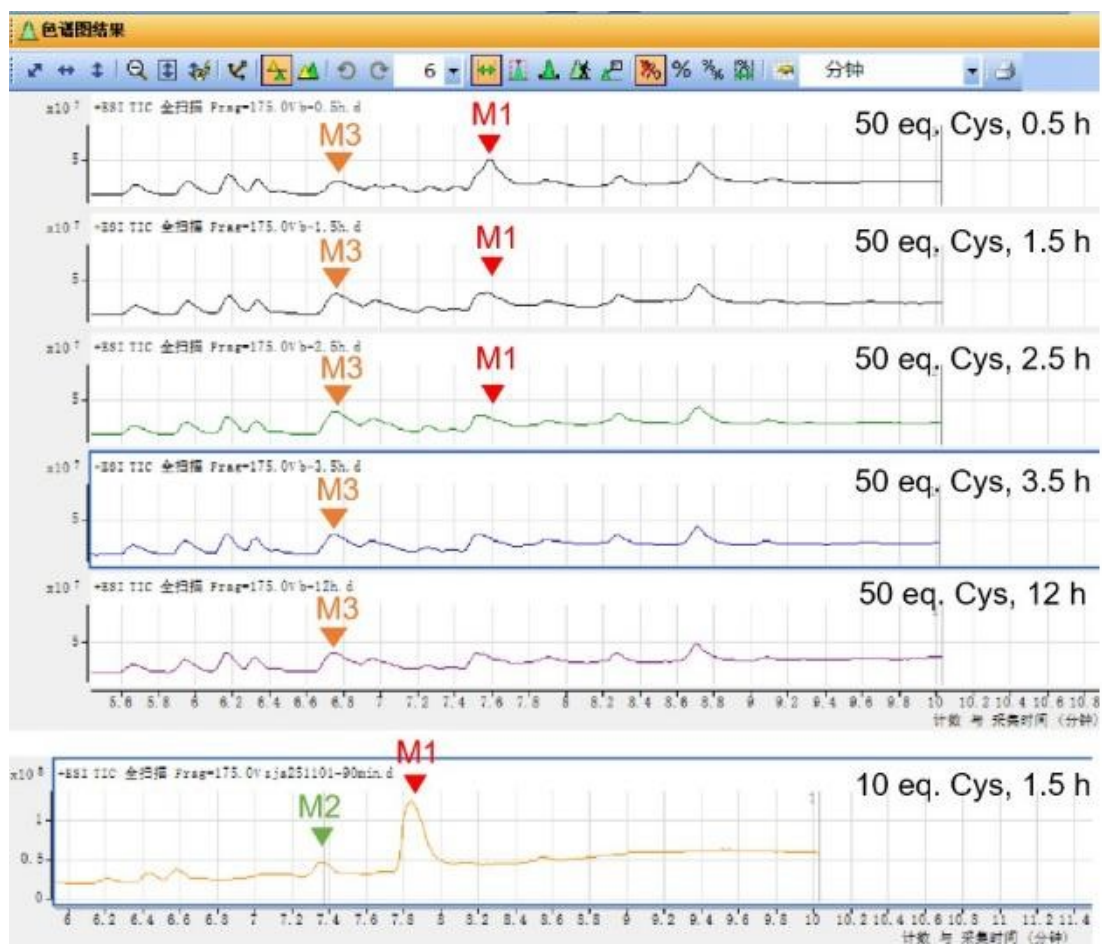

**Figure S2. The liquid chromatogram results of B15 of and Cysteine conjugate (M1-M3)**

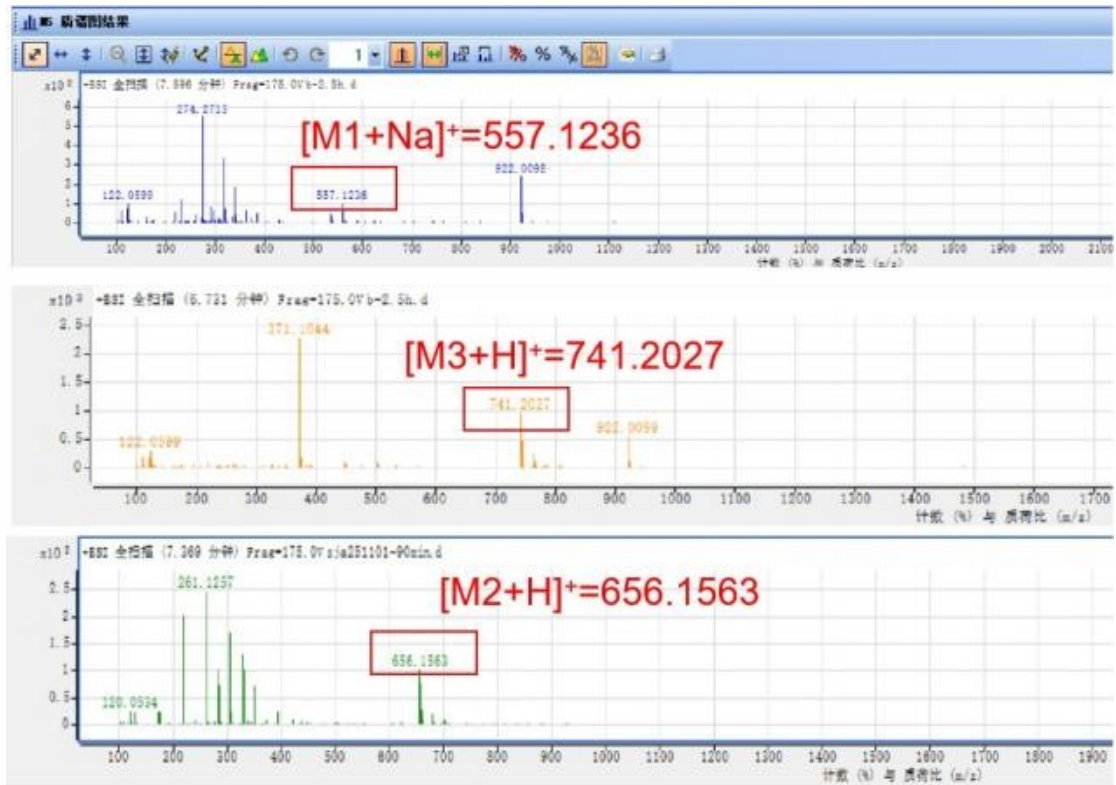

Figure S3. The HRMS spectra of B15 of and Cysteine conjugate (M1-M3)
